# Supplementary material
Source: PubMed Central journal article supplement (PMC3567265)
Supplement: mmc1.pdf [file mmc1.pdf]

**American Journal of Human Genetics, Volume 92**

**Supplemental Information**

**A Highly Unstable Recent Mutation in Human mtDNA**

**Ana T. Duggan and Mark Stoneking**

**Supplemental Inventory**

**Supplemental Figures and Tables**

Figure S1

Figure S2

Table S1

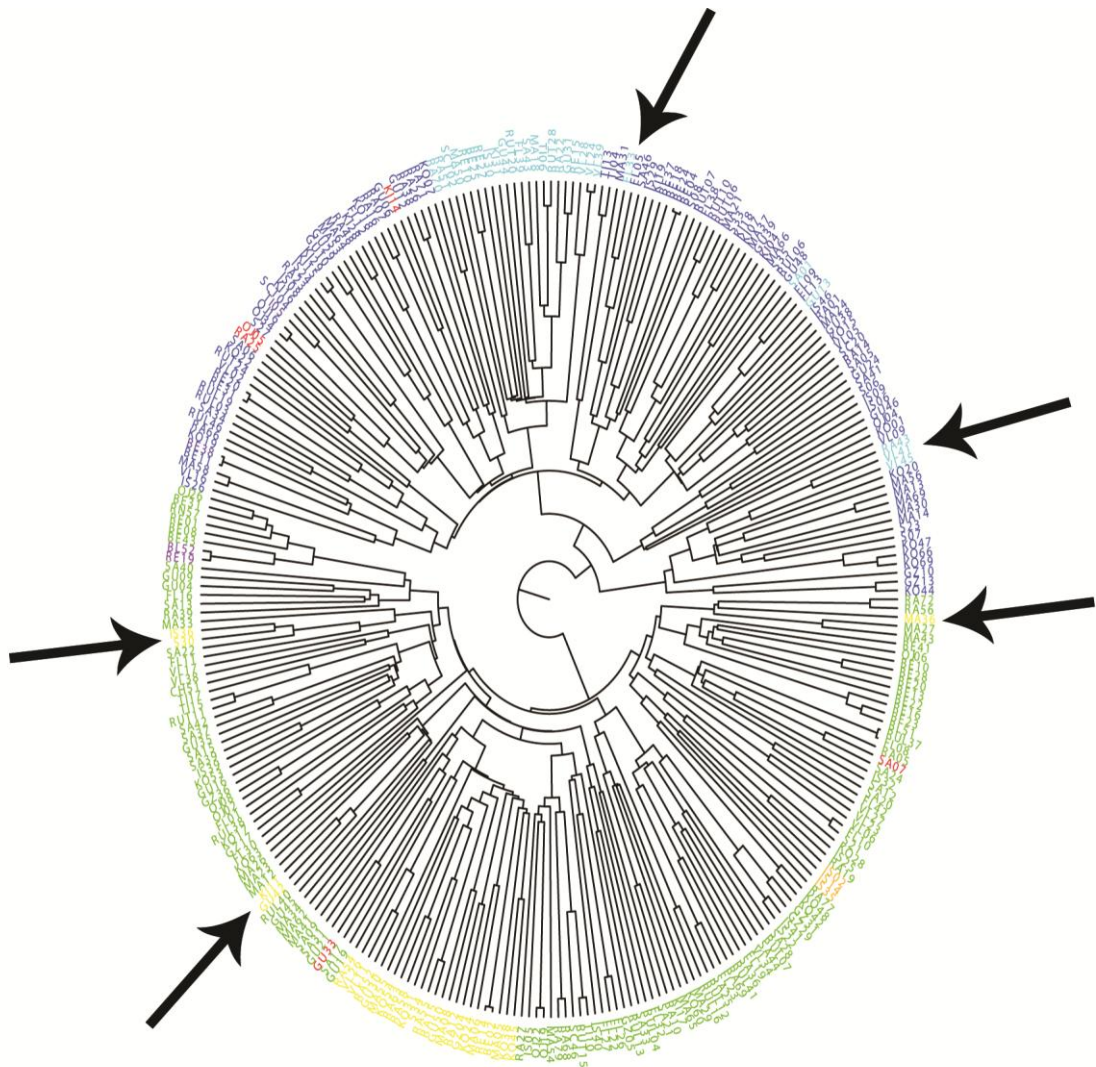

**Figure S1. A Maximum Clade Credibility Tree for All Unique Sequences amongst the 536 B4a1a1 Lineages from the Solomon Islands**

The tree was constructed using the programs BEAST and TreeAnnotator<sup>28</sup> for MCMC analysis, with a partitioned analysis using the TN93 substitution model with gamma + invariant sites distribution and applying one rate to the coding region ( $1.708 \times 10^{-8} \pm 0.15 \times 10^{-8}$  substitutions/site/year) and a second rate to the non-coding region ( $9.883 \times 10^{-8} \pm 0.15 \times 10^{-8}$  substitutions/site/year); both rates are from Soares *et al.*<sup>29</sup> MCMC was carried out for 250,000,000 iterations, sampling every 1000<sup>th</sup> iteration with 10% burn-in. Color code as follows: yellow – B4a1a1, green – B4a1a1a, purple – B4a1a1a+16247!, dark blue – B4a1a1a1, light blue – B4a1a1a1+16247!, red – heteroplasmic individuals, black arrows indicate sites of suspected additional independent back-mutations.

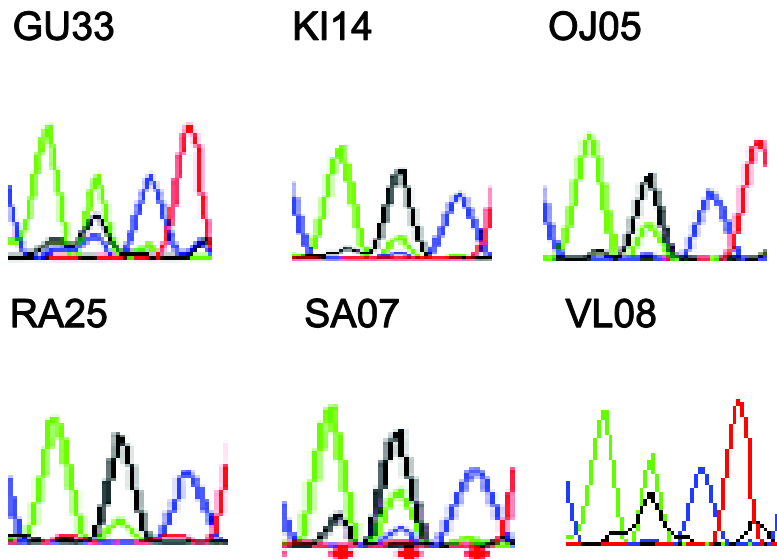

Figure S2. Chromatographs from Trace Files of HVR-1 Sanger Sequencing<sup>16</sup> Indicating Heteroplasmy of the 16247A and 16247G Alleles in 6 Individuals

**Table S1. B4a Lineage Diagnostic Positions**

| Sample | 146            | 5465           | 6719            | 6905            | 9123           | 10238          | 12239           | 14022          | 15746           | 16247          | 16247<br>Heteroplasmy |
|--------|----------------|----------------|-----------------|-----------------|----------------|----------------|-----------------|----------------|-----------------|----------------|-----------------------|
| BE01   | C:538          | C:512          | C:866,T:1       | G:835,A:1,TC:2  | A:620,G:1      | C:582,T:1      | T:717,C:1       | G:536,A:1      | G:689,A:2       | G:498,A:2      |                       |
| BE02   | C:766,T:4      | C:801,A:1      | C:1288,T:11,A:1 | A:1269,C:1      | A:966,G:2      | C:966,A:1      | T:985,C:3       | G:834,A:2,T:1  | G:1077,A:1      | A:773,G:1      |                       |
| BE03   | C:669,T:3      | C:904          | C:1469,T:7,A:5  | A:1355,G:2,C:1  | A:997,G:6      | C:1037,A:1     | T:1258,G:2,C:1  | G:1029         | G:1267,A:3      | A:851,T:1      |                       |
| BE04   | C:560,T:1      | C:628,T:4,A:1  | C:974,T:9,A:2   | G:960,A:5       | A:675,G:7      | C:626          | T:733,C:1       | G:590,A:1      | G:771,A:3       | G:586,A:9,T:1  |                       |
| BE05   | C:512,A:1,T:1  | C:622,A:1,T:1  | C:980,T:11      | G:921,A:6       | A:705,G:3      | C:633,A:3      | T:741,C:1       | G:666,A:1      | G:676,A:2       | G:558,A:3      |                       |
| BE06   | C:485          | C:572,T:1      | C:822           | A:774,C:1       | A:630          | C:601,T:1      | T:750           | G:570          | G:632,A:1,T:1   | G:481,T:1      |                       |
| BE08   | C:503,A:1      | C:546,T:5      | C:870,T:11,A:1  | A:962,C:1,G:1   | A:641,G:4      | C:567,T:1      | T:730,G:1       | G:568,A:1,C:1  | G:678,T:1       | G:474,A:18     |                       |
| BE09   | C:834,T:2      | C:662,T:2      | C:984,T:4       | A:1060,T:1      | A:876,G:4      | C:823,T:1      | T:951,C:1       | G:754,A:2      | G:946,A:5       | A:683,G:1      |                       |
| BE10   | C:659,T:1      | C:565,T:1      | C:798,T:4       | A:719           | A:640,G:2,TC:2 | C:630          | T:685,C:1       | G:593,A:1,T:1  | G:709,A:3,T:1   | G:410,A:7,T:1  |                       |
| BE11   | C:990,A:1      | C:1007,T:4,A:1 | C:1398          | G:1151,A:1,T:1  | A:1105,G:4     | C:1179         | T:1157,A:2,G:2  | G:1150         | G:1387,A:3      | G:676,A:1      |                       |
| BE12   | C:1198,T:3,A:1 | C:1078,A:2,T:2 | C:1875,T:6,A:1  | A:1955,G:2,C:1  | A:1284         | C:1329,A:3,T:2 | T:1401,C:2,AG:2 | G:1181         | G:1539,A:5      | G:995,A:5,T:1  |                       |
| BE13   | C:500,A:1,T:1  | C:886,T:4,A:3  | C:1222,T:8,A:2  | A:1041,G:1      | A:892,G:5      | C:847          | T:982,C:2       | G:870,T:3      | G:1054,A:5,C:1  | G:675,T:3      |                       |
| BE14   | C:323,T:1      | C:1102,A:2     | C:1026,A:5      | A:1616,G:1      | A:910          | C:869,A:2      | T:1321,A:1,C:1  | G:1176,T:2,A:1 | G:1291,A:2,T:2  | A:1074,G:4     |                       |
| BE15   | C:898,T:7,AG:2 | C:1250,T:3     | C:1988,T:10,A:2 | G:1492,A:7,TC:5 | A:1484,G:7     | C:1449,A:1     | T:1493,A:2,G:2  | G:1382,A:1     | G:1660,A:5,T:1  | A:1176,G:2     |                       |
| BE16   | C:966,T:4      | C:938,A:1      | C:1349,T:5,AG:3 | A:1488,C:1      | A:1075,G:3     | C:1079,T:1     | T:1285,A:2,CG:2 | G:1158,A:6,C:1 | G:1364,A:8,TC:2 | G:818,A:2      |                       |
| BE17   | C:489,A:1      | C:954,A:1,T:1  | C:1133,T:1      | A:939,G:1       | A:803          | C:1068,G:1     | T:1300          | G:1150,T:3,A:1 | G:1219,A:1      | G:604,A:2,T:2  |                       |
| BE18   | C:1242,G:1     | C:1929         | C:1768,T:5,A:2  | G:2224,A:1      | A:1669,G:3,T:1 | C:966,T:1      | T:2234,A:2,C:1  | G:2377,T:7,A:1 | G:2027,A:1      | G:2082,A:6,T:1 |                       |
| BE19   | C:650,G:1      | C:556,A:1      | C:984,T:3       | G:1075,A:2,CT:3 | A:760,G:2      | C:670          | T:796,G:2       | G:629,T:1      | G:790,A:2       | G:538,A:3      |                       |
| BE20   | C:648,A:2,T:2  | C:835,T:4,A:1  | C:1441,T:5      | A:1456,G:1      | A:986,G:8      | C:977          | T:1193,G:2,A:1  | G:885,A:4,TC:2 | G:1041,A:5      | G:803,A:2      |                       |
| BE21   | C:483,T:2,A:1  | C:572,T:3      | C:959,T:2,A:1   | A:887,T:1,G:1   | A:660,G:6,C:1  | C:659,T:1      | T:668,A:1       | G:510,T:1      | G:682           | G:462,A:2,T:1  |                       |
| BE22   | C:643,A:1,T:1  | C:636,T:2      | C:1058,T:5,A:1  | A:1105,G:2,TC:2 | A:697,G:2      | C:714,T:1,G:1  | T:882           | G:678,A:1      | G:810,A:3,T:3   | G:598,A:2      |                       |
| BE23   | C:396,A:3      | C:619          | C:848,T:1,G:1   | A:734           | A:625          | C:685,G:1      | T:807,G:1       | G:558          | G:688,T:1       | G:483,A:2      |                       |
| BE24   | C:514          | C:816,A:1      | C:1222,T:5,A:1  | G:1063,A:3      | A:886,C:1,G:1  | C:852,T:1,G:1  | T:1072,G:2,AC:2 | G:750          | G:924           | G:591,A:30     |                       |
| BE25   | C:555,A:1      | C:635,G:1      | C:917,A:2,T:2   | G:782,A:2,C:1   | A:712          | C:768          | T:816           | G:717          | G:963,A:1,T:1   | A:562,G:1      |                       |
| BE26   | C:150,T:4      | C:178,T:2,G:1  | C:218,T:3       | G:169,A:3       | A:173,G:1      | C:171          | T:193           | G:209          | G:212,A:1       | G:119,A:1      |                       |
| BE28   | C:339,T:3      | C:533,T:1      | C:707,T:2       | A:725,G:1       | A:553,G:3      | C:556,T:1      | T:660           | G:534          | G:624           | G:403          |                       |
| BE29   | C:239,T:7,G:2  | C:400,A:3      | C:547,T:4       | A:445           | A:408,G:5      | C:356,T:1      | T:512           | G:430          | G:435           | G:283          |                       |
| BE30   | C:421          | C:603,T:1      | C:775,T:3,A:2   | A:751,T:2       | A:587,G:2      | C:564          | T:642,A:1       | G:606,T:4      | G:716           | G:467,A:2      |                       |
| BE31   | C:377          | C:654,A:1      | C:747,T:3,A:1   | A:791           | A:589          | C:685          | T:743,A:1,C:1   | G:757,A:1      | G:779           | G:436,A:2,T:2  |                       |
| BE32   | C:283,A:1,T:1  | C:352,T:1      | C:574,T:3       | A:665,G:2       | A:437,G:1      | C:392          | T:541,C:1       | G:346,T:1      | G:462,A:1       | A:362          |                       |
| BE33   | C:296          | C:477          | C:566,A:1       | A:454           | A:433          | C:570,G:1      | T:661           | G:628          | G:570,A:1,T:1   | A:384,G:1      |                       |

|      |               |                |                 |                  |                |               |                 |                |                |                |   |
|------|---------------|----------------|-----------------|------------------|----------------|---------------|-----------------|----------------|----------------|----------------|---|
| BE34 | C:548,G:1     | C:456          | C:756,T:2       | A:845            | A:602,G:1      | C:572,A:1,T:1 | T:671           | G:520          | G:674,A:1      | G:473,A:2      |   |
| BE36 | C:449,A:1,T:1 | C:534,T:1      | C:945,T:3       | A:983,C:1        | A:711,G:4      | C:600,T:1     | T:861,A:1,C:1   | G:585,A:1,T:1  | G:702,A:2      | G:544,A:2,T:1  |   |
| BE37 | C:568,T:1     | C:854,T:2,A:1  | C:1278,T:2,A:1  | G:1099,A:9,T:5   | A:1110,G:8     | C:941,T:1     | T:1162,A:2,G:1  | G:874,A:1      | G:1145,A:3     | G:718,A:2      |   |
| BE38 | C:518         | C:889,A:3,TG:3 | C:1227,T:4,G:1  | G:1118,A:10,TC:2 | A:1044,G:5     | C:884,A:2,T:1 | T:1085,C:1      | G:895,A:1,T:1  | G:1013         | G:604,A:20,T:2 |   |
| BE39 | C:155         | C:234          | C:110,T:1       | A:73             | A:178,G:3      | C:61          | T:95            | G:105          | G:116,A:1      | G:234,A:83     | 1 |
| BE40 | C:583         | C:1043         | C:1580,T:5,A:3  | G:1253,A:3,C:2   | A:1103,T:2,G:2 | C:1007,G:1    | T:1377,C:2,GA:3 | G:1028,A:1,T:1 | G:1298,A:1,T:1 | G:834,A:4,T:2  |   |
| BE41 | C:408,A:2     | C:671,A:1      | C:1032,T:5      | A:1029           | A:772          | C:789         | T:991,G:1       | G:597          | G:792,T:1      | G:512,A:1      |   |
| BE42 | C:251,A:1,T:1 | C:309,T:2      | C:389,T:1       | A:370            | A:302,G:2      | C:380         | T:383,G:1       | G:372,A:2,T:1  | G:418          | G:241,A:1      |   |
| BE43 | C:260         | C:401          | C:631,T:5,A:1   | A:588,G:1        | A:447,G:2      | C:429,A:1     | T:551,A:1       | G:414          | G:555          | G:319,T:1      |   |
| BE44 | C:214         | C:549          | C:712,T:6       | A:533,C:2        | A:472          | C:495,T:1     | T:680,C:2,G:1   | G:546,A:6      | G:642,A:3      | A:398,T:1      |   |
| BL51 | C:110,T:3     | C:42,T:1       | C:76,T:8        | A:148,G:5        | A:113,G:5      | C:55,T:4      | T:121,C:6       | G:104,A:5      | G:117,A:4      | G:133,A:4      |   |
| BL52 | C:146,T:3     | C:70,T:3       | C:111,T:3       | A:209,G:3        | A:138,G:7,T:1  | C:73,T:2      | T:169,C:7       | G:129,A:8      | G:184,A:8      | A:146,G:9      |   |
| CH51 | C:92,T:3      | C:53,T:3,A:1   | C:82,T:4        | A:129,G:2        | A:154,G:1      | C:47,T:3,A:1  | T:102,C:5       | G:107,A:4      | G:136,A:7      | G:215,A:5      |   |
| CH53 | C:173,T:3     | C:70,T:5       | C:148,T:6       | A:216,G:5        | A:184,G:13     | C:64,T:2      | T:207,C:10      | G:156,A:7      | G:207,A:12,C:1 | G:223,A:4,T:1  |   |
| FL01 | C:40          | C:58,T:1       | C:73,T:1        | A:59,G:2         | A:63,G:2       | C:61          | T:67,C:1        | G:53,A:2       | G:77,A:2       | G:62,A:4       |   |
| FL05 | C:105,T:3,A:1 | C:79,T:1       | C:116,T:3       | G:90,A:5         | A:135,G:3      | C:80,T:2      | T:116,C:3       | G:105,A:2      | G:162          | G:124,A:4      |   |
| FL07 | C:51,T:1      | C:59,T:1       | C:66,T:3        | G:54,A:6         | A:74,G:7       | C:61          | T:57,C:3        | G:83,A:4       | G:91,A:4       | A:91,G:2       |   |
| FL08 | C:44,T:2      | C:32           | C:48,T:2        | A:60             | A:54           | C:35          | T:49,C:2        | G:37           | G:60,A:2       | G:79,A:2       |   |
| FL09 | C:82          | C:67,T:1       | C:92,T:11       | G:115,A:9        | A:92,G:5       | C:47,T:1      | T:98,C:4        | G:107,A:2      | G:124,A:4      | G:109,A:3      |   |
| FL10 | C:83,T:4      | C:46,T:7       | C:71,T:6        | A:129,G:2        | A:83,G:8       | C:41,T:2      | T:84,C:5        | G:69,A:10,T:1  | G:112,A:4      | G:97,A:3       |   |
| FL11 | C:69,T:2      | C:36,T:5       | C:86,T:3        | A:99             | A:84,G:10      | C:38,T:5      | T:106,C:6       | G:65,A:4       | G:91,A:3       | G:92,A:2       |   |
| FL12 | C:35,T:3      | C:10           | C:26,T:3        | G:38,A:11        | A:40,G:8       | C:19,T:2      | T:44,C:9        | G:33,A:1       | G:54,A:7       | G:40,A:6       |   |
| FL13 | C:115         | C:75,T:3       | C:91,T:4        | G:156,A:6        | A:134,G:3      | C:47,T:3      | T:122,C:3       | G:128,A:2      | G:164,A:7      | G:165          |   |
| FL16 | C:98,T:2      | C:37,T:4       | C:64,T:8        | A:124,G:4        | A:76,G:8       | C:33,T:5      | T:96,C:7        | G:65,A:14      | G:106,A:6      | G:110,A:8      |   |
| FL19 | C:59,T:4      | C:15           | C:75            | A:90,G:5         | A:85,G:3       | C:36,T:1      | T:134,C:1       | G:79,A:1       | G:94,A:2       | G:74,A:1       |   |
| FL20 | C:130,T:4     | C:22           | C:22,T:3        | A:73,G:2         | A:88,G:4       | C:16,T:1      | T:53,C:4        | G:124,A:2      | G:52,A:2       | G:147,A:1      |   |
| FL22 | C:159,T:2,A:1 | C:17           | C:112,T:5       | A:171,G:3        | A:156,G:1      | C:82,T:1      | T:190           | G:109,A:1      | G:172,A:1      | G:137,A:2      |   |
| FL23 | C:140,T:4     | C:28           | C:138,T:2       | A:211,G:3,TC:2   | A:171,G:5      | C:86,T:2      | T:195,C:1       | G:165,A:3      | G:178,T:1      | G:146,A:4      |   |
| FL26 | C:506         | C:713,T:3      | C:1285,T:2,A:1  | A:961,G:3        | A:980,G:7      | C:902,T:4     | T:1187,A:1,C:1  | G:1030,A:2     | G:1294,A:4     | G:478,A:77     |   |
| FL27 | C:608,T:5,G:2 | C:625,T:5,A:1  | C:1052,T:11,A:2 | A:1120           | A:850,G:1      | C:676,T:1     | T:861,C:3,G:1   | G:950,A:3      | G:1113,A:4,T:2 | G:560,A:1      |   |
| FL28 | C:459         | C:363,T:1      | C:646,T:1       | A:761            | A:580,G:1      | C:446         | T:568           | G:583,A:1,T:1  | G:813          | G:420,A:12     |   |
| FL29 | C:431,T:1     | C:263,T:2      | C:513,T:10,G:1  | A:706            | A:628,G:2      | C:327         | T:481,A:1       | G:478,T:1      | G:605          | G:456,A:3,T:1  |   |
| FL30 | C:924,G:1     | C:580,T:1      | C:1086,T:3,A:1  | A:1311           | A:1077,C:1     | C:588         | T:893,A:1,G:1   | G:986,A:2,C:1  | G:1186,A:2     | G:880,A:7,TC:3 |   |

|      |                |                |                 |                |                |                |                |                |                |                |    |
|------|----------------|----------------|-----------------|----------------|----------------|----------------|----------------|----------------|----------------|----------------|----|
| FL31 | C:344,T:1      | C:188,T:4      | C:391,T:14      | A:493,T:1,G:1  | A:360,G:6      | C:256,T:3      | T:353,C:4,G:1  | G:324,A:4      | G:420,A:10     | G:287,A:5      |    |
| FL32 | C:553,A:1      | C:404,T:2      | C:667,T:3       | A:706,T:2,C:1  | A:528,C:1,G:1  | C:339          | T:527,C:1      | G:523,T:2      | G:690,A:1      | G:459          |    |
| FL33 | C:363          | C:363,T:1      | C:490,T:1       | G:378,A:69     | A:460,G:1      | C:489          | T:487          | G:479,A:1      | G:480          | A:320,G:14     |    |
| FL35 | C:601,T:5,G:1  | C:498,T:4      | C:779,T:9,A:1   | A:703,G:1      | A:659,G:11     | C:657,T:8      | T:630,C:7      | G:713,A:1      | G:759,A:10,T:3 | G:424,A:10     |    |
| FL36 | C:667,A:1      | C:401,T:3      | C:1265,T:6      | A:1150         | A:1052,G:9,T:1 | C:940,T:1      | T:1241,C:1,G:1 | G:1249,A:4,T:1 | G:1387,A:7     | G:659,A:5      |    |
| FL38 | C:1153         | C:699,A:1      | C:1426,T:6,A:1  | G:1428,A:8,C:1 | A:1130,C:1,G:1 | C:1024,T:1     | T:1139         | G:1190,T:2     | G:1286,T:3,A:1 | G:797,A:3      |    |
| FL39 | C:1244,A:2     | C:711,A:1      | C:1612,T:3,G:2  | G:1503,A:5     | A:1266,G:7     | C:1091,G:2,A:1 | T:1254         | G:1327         | G:1542,T:3,A:1 | A:960,T:1,CG:2 |    |
| FL42 | C:536,T:2,A:1  | C:506          | C:646,T:3,A:1   | A:452,T:1      | A:519,G:3      | C:735,T:3      | T:674,C:2      | G:664,A:1,C:1  | G:691,A:3      | G:388          |    |
| GU03 | C:235,A:1,T:1  | C:238          | C:338,T:3       | A:183,G:2      | A:212,G:1      | C:438,T:2      | T:409          | G:278,A:1      | G:413,A:2      | G:144,A:2      |    |
| GU04 | C:559          | C:507,T:1      | C:728,T:3,A:1   | A:508          | A:525          | C:668,A:1,G:1  | T:645,C:1      | G:559,T:1      | G:643          | G:366,A:1      |    |
| GU05 | C:477,T:1      | C:347          | C:608,T:2       | G:435          | A:455,G:2      | C:638,T:2      | T:544,C:2      | G:526          | G:591,A:2      | G:374,A:9      |    |
| GU06 | C:367          | C:233          | C:455,T:4       | G:303          | A:331,G:3,C:1  | C:437,A:1,T:1  | T:461          | G:366          | G:428,A:1      | G:211,A:1      |    |
| GU08 | C:452,T:1      | C:669,A:1      | C:800,T:1       | G:255          | A:614,G:2      | C:951,A:1      | T:920,C:2      | G:794,A:1      | G:813,T:1      | A:497          |    |
| GU09 | C:370          | C:442,T:2,A:1  | C:562,T:4,A:1   | A:385          | A:381,G:2      | C:716,T:1      | T:573,C:1,G:1  | G:508,A:1      | G:647          | G:181,A:17     |    |
| GU10 | C:643,T:2,G:1  | C:497          | C:793,T:3,A:1   | G:528          | A:674,G:4,C:1  | C:659,T:2      | T:653,G:1      | G:615          | G:777          | G:437,A:2      |    |
| GU12 | C:716,G:1      | C:510          | C:915,T:3       | G:602          | A:548,G:1      | C:903,T:2      | T:807,C:2,A:1  | G:695          | G:834,A:3      | G:439,A:1      |    |
| GU13 | C:555,A:1      | C:412,T:3      | C:582           | G:387          | A:490,G:3      | C:614,T:4,G:1  | T:503,C:2,G:1  | G:493          | G:581          | A:379,G:2      |    |
| GU15 | C:578,A:1,T:1  | C:492          | C:698,T:1       | G:531,A:7,C:2  | A:559,G:2      | C:756,T:5,A:1  | T:659          | G:652,A:1      | G:693,A:2      | G:348,A:1      |    |
| GU16 | C:225,A:1      | C:259,T:2      | C:341,T:1       | A:198          | A:267,G:4      | C:418,A:2,T:2  | T:391,C:2,A:1  | G:329          | G:354,A:2      | G:160,A:13     |    |
| GU19 | C:686,T:1,G:1  | C:589          | C:920,A:2,T:2   | A:603,C:1      | A:746,G:3      | C:879,T:3      | T:851,C:1      | G:772,A:1      | G:921,A:1      | G:472,A:2,T:2  |    |
| GU21 | C:481,T:2,A:1  | C:402,A:1      | C:490,T:4       | A:386,C:1      | A:374          | C:547          | T:484          | G:485          | G:561,A:2      | G:287,A:1      |    |
| GU22 | C:1258,T:1,G:1 | C:1047,A:2,G:2 | C:1481,A:2,T:1  | G:1039,A:1     | A:1112,G:1     | C:1676,A:2,T:1 | T:1309,A:1     | G:1356,T:1     | G:1497,T:3,A:2 | G:808,A:5      |    |
| GU24 | C:445,A:1,T:1  | C:335,T:1      | C:476,T:2       | G:351,A:1      | A:379          | C:506,A:1,T:1  | T:450,C:2      | G:404          | G:474          | G:249          |    |
| GU27 | C:964,T:1      | C:774,A:1      | C:1004,T:5      | A:789,G:1      | A:743,G:1      | C:1065         | T:890,G:1      | G:768,A:1      | G:1058,A:1     | G:551,A:2      |    |
| GU29 | C:770          | C:885,T:1      | C:1135,T:2,AG:2 | G:630,A:2      | A:748,G:3,C:1  | C:1344         | T:1139,G:1     | G:1042,T:1     | G:1204,A:1,T:1 | G:474          |    |
| GU30 | C:659,T:1      | C:567          | C:767,A:1,T:1   | A:547          | A:582,G:1      | C:831,A:1,T:1  | T:690,A:1      | G:659,A:1      | G:804          | A:439          |    |
| GU31 | C:475,A:1,G:1  | C:319,T:1      | C:543           | G:395,C:1      | A:346,G:2      | C:543,T:1      | T:546,C:1,G:1  | G:410,A:1      | G:525,A:2      | A:308,G:1      |    |
| GU33 | C:483          | C:467,T:1      | C:572,T:5,A:1   | A:412,G:1      | A:426          | C:686,T:3      | T:620,C:2      | G:535,T:3,C:1  | G:642,A:1      | A:216,G:115    | IS |
| GU35 | C:674          | C:719          | C:978,T:7       | A:700,C:1,G:1  | A:616,G:5      | C:1021,T:1     | T:906,C:2,A:1  | G:939,A:2,T:1  | G:984,T:5,A:2  | G:413          |    |
| GU38 | C:402          | C:421,A:1,T:1  | C:532,T:7       | G:336,A:4,T:1  | A:393,G:2      | C:611          | T:512,C:1,G:1  | G:455,A:1      | G:596,T:1      | G:266,A:4      |    |
| GU39 | C:680,T:2      | C:531,A:1      | C:670           | G:576,A:2      | A:524,G:2      | C:787,T:2      | T:755,G:1      | G:632,A:2      | G:808,A:2      | G:389          |    |
| GU42 | C:534,T:1      | C:487          | C:698           | A:497,C:1      | A:480          | C:764          | T:658,C:2,A:1  | G:625,A:1,TC:2 | G:711,A:2      | A:407          |    |
| GU43 | C:367,T:1      | C:276,A:1,T:1  | C:360,T:5       | A:334,T:1      | A:325,G:1      | C:410,A:1      | T:393,C:1      | G:332,A:2      | G:407          | A:242          |    |

|      |                 |                |                 |                |               |                 |                 |                |                 |                |  |
|------|-----------------|----------------|-----------------|----------------|---------------|-----------------|-----------------|----------------|-----------------|----------------|--|
| GU44 | C:301           | C:239,T:1      | C:318,T:3,A:1   | G:226,A:4,T:1  | A:244,G:1     | C:400,T:1       | T:317,C:2       | G:275,A:1,T:1  | G:363,A:1       | A:213,G:1      |  |
| GU45 | C:392           | C:283          | C:490,T:2       | A:315          | A:344         | C:515,T:2       | T:495           | G:476          | G:480,A:1       | G:259,A:5      |  |
| GU46 | C:427,T:1       | C:278          | C:498,T:2       | G:363,A:2,T:1  | A:382,G:1     | C:493,A:1,T:1   | T:434           | G:360,A:1      | G:515           | G:295,A:2      |  |
| GU48 | C:337,T:1       | C:274,T:1      | C:355,T:2       | G:314          | A:315,G:1     | C:443           | T:424,C:2       | G:349          | G:418           | G:197,A:1      |  |
| GU50 | C:487,T:2       | C:394          | C:547,T:1       | A:454          | A:456         | C:583,A:1,T:1   | T:504,C:1,G:1   | G:450,A:2,T:1  | G:578           | A:350          |  |
| GU54 | C:223           | C:305          | C:359           | A:271          | A:256         | C:559           | T:422,A:1       | G:351          | G:480,A:1       | G:180,A:2      |  |
| GZ03 | C:657           | C:1701,T:4,G:1 | C:1071,T:16,A:1 | A:979          | A:1069,G:10   | C:1337,T:14,A:2 | T:1963,C:2,G:1  | G:2065,T:4,A:3 | G:1780,A:15,T:3 | G:1178,A:2,T:2 |  |
| GZ04 | C:813,T:2       | C:634,T:1      | C:1004,T:9,GA:3 | A:795          | A:765         | C:1040,T:1,G:1  | T:855,G:2,AC:2  | G:813,T:1,C:1  | G:1060,A:2      | A:639,G:1      |  |
| GZ05 | C:369,T:1,G:1   | C:277          | C:517,A:1,T:1   | A:351,T:1      | A:395,G:1     | C:563,T:1       | T:486           | G:423,T:1      | G:554,A:1,T:1   | G:269,A:1      |  |
| GZ10 | C:695,A:1       | C:546          | C:931,T:2,A:1   | G:629,A:2,TC:2 | A:689,G:2,C:1 | C:893,T:5       | T:874,C:1       | G:697          | G:904,A:2       | G:448,A:4      |  |
| GZ12 | C:882,G:2       | C:658          | C:1087,T:4      | A:859          | A:827,G:1     | C:992,T:2       | T:952,A:1       | G:897,A:1      | G:1086,T:3      | G:550,A:3,T:1  |  |
| GZ13 | C:517           | C:394          | C:634,A:2,TG:3  | G:522,A:5,T:1  | A:528,G:2     | C:638,T:2       | T:621,C:1,G:1   | G:567          | G:648,A:1,T:1   | G:354,A:1      |  |
| GZ15 | C:472,A:1,T:1   | C:344          | C:566,T:3,A:1   | A:587,G:9      | A:518,G:3     | C:487           | T:518,C:1,G:1   | G:421,A:1      | G:578           | G:380,A:4      |  |
| GZ16 | C:282,T:1       | C:354          | C:488,T:4       | A:399,C:1      | A:394         | C:440,T:1       | T:447           | G:427,A:2      | G:467,A:2,C:1   | G:258,A:2,T:1  |  |
| GZ17 | C:1021,A:1,G:1  | C:801,A:1,T:1  | C:1167,T:1      | A:1163         | A:864,G:1     | C:918,T:1       | T:936,C:1       | G:834          | G:1039          | G:695,A:9,T:1  |  |
| GZ29 | C:348,A:1       | C:452,T:1      | C:795,T:1       | A:896,G:1      | A:564,G:2     | C:477,T:1       | T:717,C:3       | G:510          | G:650           | G:382,A:9      |  |
| GZ31 | C:65,T:2        | C:49,T:1       | C:67,T:2        | A:108,G:2      | A:87,G:5      | C:33            | T:55,C:2        | G:74           | G:93,A:3        | G:95,A:1       |  |
| GZ36 | C:246,T:3,A:1   | C:122,T:2      | C:254,T:7       | A:468,G:3,T:1  | A:293,G:2     | C:117,T:4       | T:259,C:7       | G:241,A:9      | G:328,A:8       | G:471,A:3      |  |
| IS01 | C:761,T:2       | C:658,T:1      | C:859,T:12,A:2  | A:738          | A:674,G:4     | C:1042,A:2,TG:3 | T:809,G:2,C:1   | G:663          | G:950,T:1       | G:465          |  |
| IS02 | C:853,T:1       | C:800,G:1      | C:1095,T:3,A:1  | A:920          | A:837,G:3     | C:1132,A:1      | T:1059,A:2,GC:3 | G:972,A:1      | G:1257,A:2      | G:591          |  |
| IS03 | C:1079,T:2,GA:3 | C:940,T:3,A:1  | C:1301,T:7      | A:1003         | A:946,G:3,C:1 | C:1290,T:2,AG:2 | T:1177,C:4,AG:2 | G:1100,A:4,T:2 | G:1375,A:1      | A:688,G:1      |  |
| IS04 | C:1011          | C:840,A:1      | C:1203,T:3,A:2  | A:943          | A:966         | C:1183,T:2      | T:1140,A:1,C:1  | G:1116,T:1     | G:1291          | G:690,T:2,A:1  |  |
| IS05 | C:1352,T:1      | C:1005,A:1,T:1 | C:1602,T:4,AG:2 | A:1338         | A:1212        | C:1542,A:2,TG:2 | T:1518,G:3,AC:2 | G:1311,A:1     | G:1760          | G:915,A:1      |  |
| IS06 | C:537           | C:417,A:1,T:1  | C:634,T:1       | G:482,A:5      | A:534,G:1     | C:598           | T:621,A:1,CG:2  | G:588,T:2      | G:643,A:2       | G:387,A:1      |  |
| IS07 | C:827,T:4       | C:671,A:1      | C:1036,T:5,AG:2 | G:821,A:2      | A:870,G:2     | C:986,T:1       | T:994,C:4       | G:898,A:2,TC:2 | G:1096,A:3      | G:608,A:1      |  |
| IS08 | C:464,T:1       | C:388          | C:523,T:4       | G:479,A:6      | A:494         | C:506           | T:535,A:1       | G:522,A:1      | G:497,A:1       | G:441,A:1      |  |
| IS09 | C:754,T:1       | C:545          | C:822,T:2       | G:803,A:5      | A:748         | C:695,A:1       | T:785,G:1       | G:659          | G:764,A:1       | G:592,A:4      |  |
| IS10 | C:576,T:1,G:1   | C:516,A:1,T:1  | C:643,T:4       | A:670,G:1      | A:612         | C:595           | T:676           | G:588,A:1      | G:637           | A:536          |  |
| IS11 | C:956,T:1       | C:779          | C:1114,A:1,T:1  | A:1090,G:1     | A:1003,G:4    | C:952,T:1       | T:1062,A:1,C:1  | G:1018,A:1,C:1 | G:1027          | A:891,G:2,T:1  |  |
| IS14 | C:736           | C:653,T:1      | C:855,T:6,A:1   | A:962,C:1,G:1  | A:788,C:2,G:1 | C:745,T:1       | T:830,C:4       | G:712,A:2      | G:972           | G:574,A:2      |  |
| IS15 | C:461,T:20      | C:388,T:34     | C:601,T:44      | A:649,C:1      | A:544,G:30    | C:473,T:27,A:1  | T:559,C:36,G:1  | G:471,A:35     | G:583,A:47      | G:433,A:2,T:1  |  |
| IS16 | C:416,T:1       | C:372          | C:545           | G:525,A:4      | A:527         | C:562           | T:529,C:1       | G:461,A:1      | G:594           | G:353,A:1      |  |
| IS20 | C:516           | C:706,T:1      | C:933,T:11      | A:821,G:1      | A:777,G:3     | C:884,T:3       | T:896,C:2       | G:784,A:4,T:1  | G:900,A:2       | G:493,A:2      |  |

|      |                |                |                |                |               |               |                 |               |                |                |    |
|------|----------------|----------------|----------------|----------------|---------------|---------------|-----------------|---------------|----------------|----------------|----|
| IS22 | C:317          | C:322          | C:419,T:2,A:1  | A:399,T:1      | A:367,G:2     | C:456,T:1     | T:509,C:2       | G:408         | G:469,A:2      | G:245,A:1      |    |
| IS24 | C:278          | C:247          | C:352,T:1      | G:320,A:4      | A:311,G:2     | C:327         | T:412           | G:341         | G:357,A:1      | G:325          |    |
| IS25 | C:246          | C:244          | C:343,T:2      | A:319          | A:321         | C:299,T:1     | T:347           | G:330,T:1     | G:325,A:1      | G:278          |    |
| IS26 | C:697          | C:591,T:2      | C:821,T:3      | G:790,A:3      | A:657,G:2     | C:643,A:1     | T:734,C:1       | G:602         | G:760,C:1      | G:537,A:5      |    |
| IS29 | C:397          | C:316,T:1      | C:430,T:1,G:1  | G:393          | A:387         | C:368         | T:470,C:1       | G:393,A:2     | G:402,A:1      | G:292,A:1      |    |
| IS30 | C:242,T:1      | C:274          | C:429,T:1      | G:364,A:9,C:1  | A:408         | C:429         | T:486,A:1,G:1   | G:397,A:1     | G:462          | A:356,G:6      |    |
| IS32 | C:275          | C:242          | C:340,T:2      | A:354,G:8      | A:302,G:4     | C:311         | T:380,C:1       | G:312,A:1     | G:366          | G:291,A:3      |    |
| IS33 | C:360          | C:284,A:1,T:1  | C:418,T:1      | A:395          | A:345,G:2     | C:369,T:1     | T:390           | G:347,T:1     | G:374,T:1      | G:306          |    |
| IS35 | C:608,A:1      | C:497,T:2      | C:645,A:1,T:1  | A:593          | A:605,G:6     | C:555         | T:629,C:3,A:1   | G:527,A:1,T:1 | G:661,A:3,T:1  | G:465          |    |
| IS36 | C:977,T:3      | C:920,A:1,TG:2 | C:1293,A:2,T:2 | A:1277,G:2     | A:1082        | C:1072        | T:1103,A:1,CG:2 | G:968,T:1     | G:1196,T:3,C:1 | A:891,G:1      |    |
| IS37 | C:786,T:2,A:1  | C:570,T:1      | C:845          | A:778,C:1      | A:741,C:1,G:1 | C:730,T:1,G:1 | T:781,C:1       | G:728,A:1     | G:823          | G:577,A:3      |    |
| IS39 | C:636,T:8      | C:543,T:10,A:1 | C:726,T:8      | A:668          | A:562,G:3     | C:613,T:3     | T:635,C:3,G:1   | G:639,A:6,T:1 | G:638,A:4      | G:518,A:1      |    |
| IS40 | C:261          | C:212,T:2      | C:366,T:1      | A:342          | A:283,G:2     | C:284         | T:289           | G:279,A:1     | G:310,A:1      | G:243,A:1      |    |
| IS41 | C:152          | C:161,T:1      | C:217,T:1      | A:230          | A:167,G:2     | C:209,A:1     | T:224           | G:189         | G:208,A:1      | G:147,A:12     |    |
| IS45 | C:631,T:5      | C:502,T:3      | C:792,T:8,A:1  | A:794          | A:686,G:4     | C:643,T:4,G:1 | T:685,C:2,A:1   | G:619,A:3     | G:726,A:2      | G:532,T:3      |    |
| IS46 | C:821,T:3      | C:652,T:1      | C:1006,T:6,A:1 | G:971,A:7,TC:2 | A:871,G:1     | C:793,T:1     | T:870           | G:719,A:3,T:1 | G:931,A:2      | G:686,A:1      |    |
| KI04 | C:190          | C:300          | C:318          | G:379,A:9      | A:314         | C:140         | T:360,C:1       | G:361         | G:334          | G:290          |    |
| KI07 | C:95,A:1       | C:138,T:1      | C:208,T:1      | G:134,A:52     | A:157         | C:192,T:1     | T:208,C:2       | G:202         | G:195          | G:108          |    |
| KI11 | C:346,T:2      | C:289,T:1      | C:469,T:2,A:1  | A:462,G:1      | A:376,G:4     | C:355         | T:403           | G:354,C:1     | G:414          | A:316          |    |
| KI14 | C:284          | C:395,T:1      | C:488,T:5      | G:436,A:1,TC:2 | A:446,G:1     | C:301         | T:544,C:1       | G:465,A:1     | G:464,T:1      | G:246,A:87,T:1 | IS |
| KI15 | C:483,T:3,G:1  | C:469,T:4      | C:623,T:8      | G:609,A:5      | A:550,G:6     | C:509,T:6     | T:622,C:3       | G:575,A:6     | G:641,A:5      | G:446,A:2,C:1  |    |
| KI16 | C:529          | C:516          | C:744,T:2,A:1  | G:623,A:6      | A:610,G:2,C:1 | C:654,A:2     | T:676,C:1       | G:574,T:1     | G:759,A:2      | G:475          |    |
| KI17 | C:523,A:1      | C:387,T:1      | C:559,T:1      | A:503,C:1,G:1  | A:486         | C:431         | T:542           | G:428,A:1     | G:518          | G:398          |    |
| KI18 | C:155          | C:164,T:11     | C:209,T:16     | G:187,A:19     | A:221,G:7     | C:191,T:13    | T:236,C:11      | G:209,A:9     | G:238,A:14     | G:142,A:3      |    |
| KI19 | C:174,A:1      | C:127          | C:262          | G:215,A:1      | A:209,G:1     | C:182         | T:221           | G:204         | G:233          | G:159          |    |
| KI21 | C:412,T:2      | C:310,T:1      | C:488,T:1      | G:510,A:2      | A:463         | C:335,A:1     | T:416,C:1       | G:421         | G:494,A:2      | G:340          |    |
| KI25 | C:497,A:1,T:1  | C:461,T:1      | C:583,T:7      | A:541,G:2      | A:532         | C:548,T:1     | T:567,C:2       | G:496,A:1     | G:599          | G:349,A:3      |    |
| KI28 | C:438,A:1,TG:2 | C:403,T:1      | C:519,T:1      | G:446,A:4,T:1  | A:449,G:1     | C:455         | T:577,C:2       | G:452,A:2     | G:517,T:1,C:1  | G:354          |    |
| KI29 | C:174,A:1      | C:202          | C:309,T:2      | G:283,A:1      | A:281         | C:289         | T:299,A:2       | G:262,A:1     | G:255,A:1      | G:199          |    |
| KI31 | T:378          | C:380          | C:444,T:1      | G:449,A:1      | A:432,G:2,C:1 | C:414         | T:476,A:1       | G:377         | G:485,A:2      | A:293,G:74     | I  |
| KO01 | C:290,T:1      | C:137,T:3,G:1  | C:266,T:5,A:1  | G:333,A:15     | A:309,G:5     | C:141,T:6     | T:315,C:6       | G:258,A:4     | G:318,A:4      | G:336,A:3,T:1  |    |
| KO02 | C:298,T:5      | C:123,T:8      | C:223,T:5      | A:403,G:7      | A:324,G:11    | C:132,T:6     | T:342,C:7       | G:257,A:6,T:1 | G:315,A:10     | A:456,G:6      |    |
| KO07 | C:249,T:6      | C:136,T:1      | C:239,T:7      | G:229,A:17     | A:236,G:6     | C:135,T:2,A:1 | T:243,C:10,A:1  | G:213,A:7     | G:232,A:6,T:1  | G:272,A:4,T:1  |    |



|      |               |              |               |               |               |              |               |                |               |               |  |
|------|---------------|--------------|---------------|---------------|---------------|--------------|---------------|----------------|---------------|---------------|--|
| KO08 | C:193,T:3     | C:87,T:1     | C:132,T:7     | G:213,A:7     | A:199,G:7     | C:100,T:2    | T:191,C:6     | G:133,A:8      | G:178,A:13    | G:255,A:2     |  |
| KO10 | C:186,T:2     | C:96,T:6     | C:178,T:3     | G:231,A:13    | A:236,G:10    | C:96,T:6     | T:239,C:3     | G:188,A:3      | G:199,A:12    | G:249,A:3     |  |
| KO14 | C:131,T:1     | C:86,T:3     | C:148,T:2     | A:192,G:5     | A:184,G:8     | C:105,T:2    | T:150,C:7     | G:124,A:2      | G:145,A:6     | G:194,A:5     |  |
| KO15 | C:202,T:3     | C:78,T:5     | C:138,T:3,A:1 | G:189,A:8,T:1 | A:194,G:4     | C:94,T:2     | T:197,C:7     | G:161,A:6      | G:192,A:7     | G:243,A:1,T:1 |  |
| KO16 | C:146,T:2     | C:86,T:2     | C:139,T:1     | A:180,G:3     | A:182,G:4     | C:72,T:1     | T:168,C:6     | G:129,A:7,T:1  | G:156,A:4     | G:169,A:6     |  |
| KO17 | C:240,T:1,G:1 | C:101,T:1    | C:234,T:8     | A:315,G:2     | A:312,G:10    | C:154,T:3    | T:271,C:2,G:1 | G:231,A:11     | G:229,A:5     | G:271,A:4,T:1 |  |
| KO18 | C:121,T:2     | C:63,T:7     | C:120,T:3     | G:168,A:11    | A:106,G:8     | C:51,T:3     | T:118,C:8     | G:73,A:2       | G:130,A:5     | G:151,A:4     |  |
| KO19 | C:220,T:2     | C:74,T:3     | C:174,T:4     | G:274,A:3     | A:217,G:3     | C:75,T:6     | T:226,C:1     | G:168,A:2      | G:225,A:9     | G:348,A:8     |  |
| KO20 | C:179,T:3     | C:116,T:5    | C:199,T:5     | G:232,A:7     | A:212,G:12    | C:114,T:4    | T:195,C:6     | G:150,A:5      | G:205,A:3     | G:199,A:6,T:1 |  |
| KO21 | C:403,T:5     | C:240,T:3    | C:340,T:9     | A:446,G:4     | A:392,G:9     | C:247,T:3    | T:393,C:4     | G:361,A:9      | G:417,A:10    | G:339,A:8     |  |
| KO22 | C:134,T:2     | C:87,T:4     | C:122,T:4     | G:168,A:11    | A:147,G:1     | C:89,T:2     | T:157,C:6,G:1 | G:129,A:3      | G:156,A:4     | G:194,A:1     |  |
| KO23 | C:111,T:2     | C:68,T:3     | C:96,T:2      | A:144,G:1     | A:95,G:2      | C:55,T:1     | T:108,C:5     | G:114,A:4      | G:119,A:3     | A:110,G:16    |  |
| KO24 | C:262,T:3     | C:93,T:2     | C:188,T:4     | A:314,G:4     | A:248,G:5     | C:102,T:3    | T:238,C:11    | G:215,A:9      | G:288,A:9     | A:270,G:14    |  |
| KO25 | C:156,T:4     | C:100,T:2    | C:127,T:8     | G:261,A:8     | A:223,G:7     | C:90,T:1     | T:199,A:1,C:1 | G:168,A:6      | G:216,A:3     | A:353,G:4     |  |
| KO26 | C:168,T:2     | C:62         | C:116,T:3     | A:253,G:2     | A:193,G:9     | C:88,T:4     | T:174,C:4     | G:152,A:7      | G:203,A:2     | G:197,A:4     |  |
| KO27 | C:140,T:6     | C:107,T:1    | C:112,T:7     | A:190,G:2     | A:192,G:4,T:1 | C:67,T:3     | T:151,C:3     | G:167,A:8      | G:216,A:6     | G:219,A:1,C:1 |  |
| KO28 | C:212,T:5     | C:163,T:4    | C:188,T:4,A:1 | A:309,G:2     | A:327,G:8     | C:103,T:2    | T:252,C:6     | G:275,A:6      | G:349,A:4     | G:379,A:7     |  |
| KO30 | C:243,T:3     | C:111,T:6    | C:176,T:2,A:1 | A:284,G:3     | A:253,G:12    | C:100,T:2    | T:254,C:3     | G:177,A:9      | G:259,A:6     | G:299,A:4     |  |
| KO31 | C:152,T:1     | C:93,T:4     | C:121,T:5     | A:218,G:3     | A:199,G:10    | C:59,T:2     | T:174,C:8     | G:180,A:3      | G:211,A:8     | A:339,G:3     |  |
| KO32 | C:274,T:5     | C:107,T:7    | C:190,T:6     | A:347,G:6     | A:280,G:17    | C:104,T:5    | T:284,C:3     | G:189,A:7      | G:283,A:8     | G:315,A:5     |  |
| KO36 | C:180         | C:101,T:4    | C:190,T:6     | G:241,A:9     | A:211,G:7     | C:97,T:5     | T:211         | G:159,A:4,T:1  | G:204,A:7     | G:279,A:3     |  |
| KO38 | C:118,T:2     | C:89,T:1     | C:142,T:5     | A:198,G:2     | A:184,G:5     | C:82,T:4     | T:162,C:5     | G:140,A:3,T:1  | G:165,A:1     | A:249,G:9     |  |
| KO42 | C:165,T:2     | C:130,T:3    | C:135,T:6     | A:278,G:5     | A:265,G:2     | C:89,T:4     | T:190,C:4     | G:224,A:7,T:2  | G:226,A:6     | G:433,A:4     |  |
| KO44 | C:131,T:6     | C:54,T:3,G:1 | C:101,T:5     | G:209,A:16    | A:134,G:7     | C:55,T:6,A:1 | T:145,C:7     | G:95,A:1       | G:158,A:6     | G:229,A:6     |  |
| KO45 | C:91,T:8      | C:35,T:6     | C:77,T:10     | A:137,G:4     | A:89,G:14     | C:38,T:2     | T:117,C:13    | G:77,A:10      | G:101,A:7,T:1 | A:154,G:12    |  |
| KO46 | C:114,T:1     | C:53,T:1     | C:81,T:5      | G:145,A:8     | A:117,G:6     | C:62,T:2     | T:134,C:1     | G:120,A:5      | G:145,A:5     | G:144,A:7     |  |
| KO47 | C:185,T:4     | C:73,T:7     | C:151,T:8     | G:190,A:20    | A:145,G:9     | C:78,T:8     | T:181,C:8     | G:138,A:10,T:1 | G:170,A:9     | G:178,A:8     |  |
| KO48 | C:119,T:2     | C:56,T:2     | C:95,T:1      | A:165,G:2     | A:143,G:2     | C:62,T:4     | T:119,C:3     | G:93,A:2       | G:119,A:6,T:1 | G:126,A:5     |  |
| KO52 | C:102,T:1     | C:73,T:1     | C:92,T:1      | A:161,G:1     | A:133,G:5     | C:48,T:1     | T:115,C:6     | G:110,A:4      | G:131,A:3     | G:305,A:1     |  |
| KO53 | C:148,T:4     | C:68,T:5     | C:134,T:9     | A:187,G:1     | A:138,G:6     | C:69,T:3     | T:139,C:7     | G:131,A:4      | G:167,A:2     | G:187,A:2     |  |
| KO54 | C:159,T:2,G:1 | C:75,T:1     | C:136,T:2     | A:204,G:2     | A:167,G:2     | C:74,T:3     | T:164,C:1     | G:111,A:2      | G:172,A:6     | A:170,G:3     |  |
| KO60 | C:82,T:3      | C:38,A:1,T:1 | C:87,T:2,A:1  | A:108,G:2     | A:100,G:3     | C:38         | T:72,C:6      | G:60,A:3       | G:83,A:4      | G:119,A:1     |  |
| KO63 | C:117,T:1     | C:80,T:4     | C:101,T:2     | A:177,G:3     | A:190,G:4     | C:72,T:3     | T:125,C:2     | G:147,A:2      | G:196,A:2,C:1 | G:243,A:2     |  |

|      |               |            |                |                |               |              |                |               |               |               |   |
|------|---------------|------------|----------------|----------------|---------------|--------------|----------------|---------------|---------------|---------------|---|
| KO66 | C:89,T:3      | C:85,T:4   | C:69,T:1       | G:145,A:5      | A:130,G:5     | C:38,T:1     | T:93,C:5,G:1   | G:106,A:5     | G:140,A:1     | G:197,A:8     |   |
| KO68 | C:287,T:6     | C:157,T:3  | C:265,T:10     | A:513,G:7      | A:322,G:10    | C:150,T:2    | T:349,C:7      | G:274,A:11    | G:332,A:8     | G:543,A:8     |   |
| KO69 | C:194,T:5,A:1 | C:106,T:10 | C:186,T:6      | G:302,A:17     | A:220,G:4     | C:94,T:1     | T:223,C:7,A:1  | G:170,A:5,T:1 | G:203,A:6     | G:299,A:2     |   |
| KO70 | C:177,T:3     | C:72,T:6   | C:147,T:6      | A:224,G:4      | A:187,G:14    | C:79,T:6,A:1 | T:151,C:10,A:1 | G:147,A:7     | G:161,A:7     | G:274,A:2     |   |
| KO71 | C:103,T:1     | C:46,T:5   | C:87,T:4       | A:152,G:3      | A:139,G:9     | C:37,T:4,A:1 | T:132,C:4      | G:84,A:7      | G:107,A:4,C:1 | A:239,G:8     |   |
| MA03 | C:244,T:2     | C:102,T:1  | C:195          | A:292,G:5      | A:215,G:1     | C:115,T:3    | T:248,C:4      | G:145,A:1     | G:218,A:2     | G:156,A:5     |   |
| MA05 | C:91,T:2      | C:49       | C:76           | A:103,G:1      | A:100,G:3,T:1 | C:48,T:1     | T:119,C:2      | G:63,A:1      | G:106         | A:95,G:3      |   |
| MA06 | C:27,T:1      | C:17       | C:30,T:1       | A:39,G:2       | A:40,G:2      | C:20,T:2     | T:37,C:1       | G:37,A:2      | G:26          | A:34,G:3      |   |
| MA07 | C:187,T:7,A:1 | C:93,T:1   | C:138,T:3      | G:246,A:11     | A:205,G:4     | C:116        | T:223,C:3      | G:155,A:2,T:1 | G:202,A:2,T:1 | G:180,A:2     |   |
| MA08 | C:100,T:2     | C:13,T:2   | C:68,T:4       | A:108,G:10,C:1 | A:108,G:2     | C:39,T:3     | T:126,C:3      | G:86,A:5      | G:137,A:3     | A:91,G:33,C:1 | 1 |
| MA11 | C:181,T:3     | C:64,T:2   | C:106,T:2      | A:204,G:6,TC:2 | A:136,G:3     | C:79,T:1     | T:177,C:4      | G:110,A:2     | G:145,A:2     | G:129,A:2,T:1 |   |
| MA12 | C:243,T:6     | C:92,T:1   | C:137,T:1      | A:210,G:3,T:1  | A:196,G:3     | C:140        | T:223,C:5      | G:144         | G:189,A:2     | G:162,A:1,C:1 |   |
| MA13 | C:130,T:2     | C:48,T:2   | C:84,T:1       | G:123,A:7      | A:93,G:5      | C:55         | T:122,C:1      | G:71,A:1      | G:110,A:3     | G:75,A:4,T:1  |   |
| MA14 | C:83          | C:37,T:2   | C:76,T:3       | G:109,A:6,T:2  | A:102,G:3     | C:38         | T:104,C:7      | G:75,T:2,A:1  | G:79,A:4      | G:97,T:2,A:1  |   |
| MA16 | C:204,T:4     | C:102      | C:180,T:2,A:1  | G:270,A:5,C:1  | A:211,C:1,G:1 | C:109        | T:256,C:4      | G:162,A:3,T:1 | G:213,A:3,T:1 | G:192,A:3     |   |
| MA18 | C:83,T:2,G:1  | C:49,T:3   | C:67           | G:121,A:8      | A:110,G:2     | C:55,T:1     | T:115,C:3      | G:72,A:1      | G:89,A:2      | A:123,G:7     |   |
| MA20 | C:388,T:6     | C:156      | C:263,T:4      | G:426,A:5,TC:3 | A:378,G:3     | C:161,T:2    | T:400,C:3,A:1  | G:288,A:7     | G:376,A:6,T:1 | A:346,G:5     |   |
| MA21 | C:252,T:2     | C:131,T:1  | C:176,T:5,AG:2 | G:244,A:6      | A:238,G:2     | C:126,T:2    | T:263,C:2,G:1  | G:188,A:3,T:1 | G:262,A:5     | G:211,A:2,T:1 |   |
| MA23 | C:85,T:1      | C:32,T:5   | C:51,T:1       | A:85,G:7       | A:75,G:3      | C:48,T:2     | T:104,C:8      | G:51,A:2      | G:80,A:3      | G:69,A:3      |   |
| MA24 | C:132,T:3,A:1 | C:72       | C:97,T:2       | G:171,A:3,T:1  | A:184,G:2     | C:68         | T:200,C:1      | G:135,A:4,T:1 | G:139,A:2     | G:149,A:1     |   |
| MA25 | C:94,T:1      | C:49,T:1   | C:90,T:2       | A:101,G:5      | A:87,G:4      | C:59,T:3     | T:143,C:2      | G:61          | G:92,A:2      | G:61,A:1      |   |
| MA26 | C:89,T:2      | C:43,T:2   | C:66,T:2       | A:111,G:2      | A:83,G:3      | C:33,A:1,T:1 | T:94,C:1       | G:52,A:2      | G:66,A:2      | G:76,A:4      |   |
| MA27 | C:38,T:3      | C:4        | C:18,T:2       | A:55,G:1       | A:27,G:1      | C:20,T:2     | T:39,C:2       | G:31,A:3      | G:26,A:4      | G:30,A:3      |   |
| MA28 | C:106,T:4     | C:13       | C:67,T:2       | A:101,G:3      | A:69,G:3      | C:27,T:1     | T:120,C:3      | G:83,A:2      | G:93,A:3      | G:75,A:4      |   |
| MA29 | C:141,T:4     | C:102,T:2  | C:122          | A:177,G:2      | A:159,G:3     | C:62         | T:208,C:5      | G:131,A:2,T:1 | G:185,A:3     | G:133         |   |
| MA30 | C:112,T:1     | C:39,T:2   | C:68           | G:107,A:6      | A:87,G:2      | C:41         | T:102,C:2      | G:88          | G:85,A:2      | G:90          |   |
| MA31 | C:99,T:1      | C:8        | C:85,T:2       | G:141,A:6      | A:122,G:4     | C:58         | T:120,C:2      | G:77,A:1      | G:120,A:5     | G:114,A:1     |   |
| MA33 | C:105,T:2     | C:52,T:1   | C:78,T:5       | A:131,G:3      | A:107,G:2     | C:58,T:3     | T:140,C:5      | G:101,A:1     | G:97,A:3      | G:90,A:9      |   |
| MA34 | C:106         | C:58,T:1   | C:78,T:3       | A:150,G:2      | A:108,G:4     | C:58,T:1     | T:121,C:6      | G:101,A:3     | G:129,A:4     | G:123,C:1     |   |
| MA36 | C:210,T:3,A:1 | C:91,T:2   | C:147          | A:261,G:7      | A:193,G:8,C:1 | C:115,T:4    | T:220,G:1      | G:154,A:2     | G:208,A:2,T:1 | A:221,G:2     |   |
| MA37 | C:129         | C:56,T:2   | C:76,T:3       | G:114,A:4      | A:119,G:3     | C:47         | T:133,C:2      | G:94,A:2      | G:99,A:1,T:1  | G:83,A:2      |   |
| MA41 | C:152,T:3     | C:59       | C:86,T:1       | A:163,G:7      | A:126,G:4     | C:77         | T:175,C:6,G:1  | G:123,A:3     | G:136,A:3     | G:123,A:3     |   |
| MA43 | C:75          | C:25       | C:47,T:4       | A:98,G:3       | A:59,G:5      | C:43,T:1     | T:85,C:2       | G:60,A:2      | G:73,A:4      | G:72          |   |

|      |                |               |                 |                 |                |              |                |               |                 |               |    |
|------|----------------|---------------|-----------------|-----------------|----------------|--------------|----------------|---------------|-----------------|---------------|----|
| MA44 | C:63,T:2       | C:9           | C:64,T:3        | G:76,A:5        | A:63,G:6,C:1   | C:39,T:1     | T:91,C:3       | G:45,A:1      | G:60,A:1        | G:75,A:1      |    |
| MA46 | C:71,T:4       | C:26,T:1      | C:59,T:1        | G:72,A:1        | A:65,G:1       | C:28,A:1     | T:85,C:2       | G:55,A:1      | G:63,A:3        | G:68          |    |
| MA50 | C:56,T:1       | C:8           | C:35,T:2        | G:73,A:6,C:1    | A:45,G:3       | C:21,T:4     | T:87,A:1,C:1   | G:60,A:1,T:1  | G:49,A:2        | A:86,G:6      |    |
| MA51 | C:66,T:1       | C:21,T:1      | C:48            | G:75,A:5        | A:71,G:2,C:1   | C:31         | T:65,C:4       | G:49,A:1,T:1  | G:73,A:2        | G:57,A:2      |    |
| MA53 | C:56,T:2       | C:9           | C:35,T:3        | G:57,A:2        | A:44,G:4       | C:24,T:1     | T:53,C:2       | G:45,A:1,T:1  | G:60,A:1        | G:44          |    |
| MA54 | C:123,T:1      | C:53          | C:108,T:3       | A:167,G:4       | A:111,G:4      | C:54,T:2     | T:160,C:2      | G:95,A:5      | G:118,A:5       | G:112,A:1,T:1 |    |
| MA55 | C:115,T:3      | C:7           | C:80,T:3        | A:151,G:1       | A:102,G:3      | C:52         | T:130,C:1      | G:103,A:3     | G:113,A:5       | A:55,G:27     | I  |
| MA56 | C:68,T:3       | C:27,T:1      | C:61            | G:55,A:2,T:1    | A:63,G:2       | C:26         | T:66,C:1       | G:49,A:2      | G:52            | G:59,A:1      |    |
| MA58 | C:106,T:3      | C:52,T:2      | C:64,A:2        | G:93,A:4        | A:100,G:6      | C:49,T:1     | T:123,C:4      | G:86,A:3,T:2  | G:81,A:2        | G:96,A:2      |    |
| MA59 | C:102,T:3      | C:17          | C:61            | G:111,A:6,TC:2  | A:105,G:8      | C:56,T:2     | T:122,C:7,A:2  | G:85,A:5,T:1  | G:92,A:8        | G:108,T:1     |    |
| MA60 | C:127,T:2      | C:71,T:2      | C:86            | A:144,G:3       | A:121,G:2      | C:63,T:1     | T:142,C:3      | G:109,A:2     | G:137,A:4       | A:139,G:4     |    |
| MA61 | C:227,T:4      | C:112,T:2     | C:180,T:4,A:1   | G:278,A:9       | A:253,G:5      | C:117,T:1    | T:249,C:2,A:1  | G:236,A:2,T:2 | G:241,A:4       | A:229,G:2     |    |
| MA62 | C:132,T:4      | C:7           | C:64,T:2        | A:124,G:4       | A:113,G:3      | C:51         | T:136,C:3      | G:94,A:3      | G:103,A:4,T:1   | G:119,A:2     |    |
| MA64 | C:83,T:1       | C:38,T:2      | C:69,T:2        | G:81,A:5        | A:75,T:1,G:1   | C:40         | T:112,C:2      | G:58,A:1      | G:86,A:1        | G:68,T:1      |    |
| MA65 | C:70,T:3       | C:32,T:3      | C:56,T:4        | A:81,G:3,T:1    | A:65,G:2       | C:37         | T:116,C:7      | G:63,A:1      | G:80,A:5        | G:88,A:1      |    |
| MA66 | C:98,T:1       | C:60,T:2      | C:85,T:3        | G:101,A:11      | A:109,G:2,C:1  | C:41,T:2,A:1 | T:149,C:5      | G:93,A:2      | G:91,A:3        | G:92,A:3      |    |
| MA69 | C:77,T:2       | C:8           | C:65,T:3        | G:84,A:4        | A:66,G:3       | C:34,T:3     | T:90,C:7       | G:66,A:1      | G:97            | G:86,A:3      |    |
| MA72 | C:106,T:1      | C:50,T:1      | C:86,T:3        | G:143,A:3       | A:115,G:3      | C:52,T:1     | T:151          | G:110,A:3     | G:117,A:3,T:1   | G:170,A:1     |    |
| MA74 | C:81,T:3       | C:34,T:2      | C:68,T:3        | A:98,G:2        | A:72,G:6       | C:35,T:1     | T:111,C:3      | G:60          | G:80,A:5        | G:84,A:1      |    |
| OJ02 | C:1039,T:2,A:1 | C:604,T:6     | C:894,A:4,T:2   | A:1323          | A:847,G:3      | C:586,T:2    | T:705,C:4,G:1  | G:768,A:3     | G:1001,A:3      | G:667,A:6     |    |
| OJ03 | C:951,A:1,T:1  | C:679         | C:1258,T:3,A:2  | A:1403,G:3      | A:1115,G:3,T:1 | C:846        | T:1091,A:4,G:1 | G:1177,A:1    | G:1533,C:1      | G:785,A:5     |    |
| OJ04 | C:484,A:1      | C:350         | C:555,T:2       | G:654,A:2       | A:458,G:3      | C:401,T:4    | T:502,C:2      | G:523         | G:695,T:3,A:1   | G:388,A:2     |    |
| OJ05 | C:399,T:1      | C:318,T:2     | C:629,T:6,A:1   | G:602,A:19      | A:541,G:7      | C:346,T:1    | T:504,C:4      | G:516,A:5     | G:754,A:3,T:1   | G:283,A:185   | IS |
| OJ06 | C:683,G:2,T:1  | C:493,T:1     | C:839,T:5,G:1   | A:1076,G:1      | A:725,G:2,C:2  | C:518,T:1    | T:723,C:1,G:1  | G:728,A:2     | G:922           | G:566,A:1     |    |
| OJ07 | C:766,T:1      | C:472,T:2     | C:903,T:3       | G:1169,A:4,TC:2 | A:813,G:1      | C:594        | T:725,C:1,G:1  | G:754,T:1     | G:879           | G:592,A:4     |    |
| OJ08 | C:566          | C:354         | C:627,T:6       | A:872           | A:551,G:5      | C:462        | T:550,C:1      | G:496         | G:616,A:1       | G:421,A:1     |    |
| OJ10 | C:533,A:1      | C:366         | C:591,T:3       | A:755,G:1       | A:551,G:3      | C:372,T:1    | T:469,A:1      | G:479,A:1     | G:574           | G:421,A:3     |    |
| OJ13 | C:676          | C:645,T:1     | C:1067,T:3,A:1  | A:1107,G:2      | A:830,G:2      | C:736,A:1    | T:964,C:1,G:1  | G:947,A:1,T:1 | G:1195,A:1,TC:2 | G:660,A:2     |    |
| OJ14 | C:861          | C:739         | C:1356,T:11,A:3 | A:1578,T:1      | A:1197,G:3,T:1 | C:851        | T:1235,A:2,C:1 | G:1258,T:1    | G:1492,T:1      | G:930,A:2     |    |
| OJ15 | C:873          | C:656,A:1     | C:1055,T:6,A:2  | A:1346,G:1      | A:963,G:1      | C:709,T:1    | T:955,C:2      | G:950,A:1     | G:1236,T:2,AC:2 | G:729,A:2,T:1 |    |
| OJ16 | C:438          | C:289,A:1     | C:539,T:3       | G:693,A:1,T:1   | A:504,G:4      | C:348,T:1    | T:478,C:1      | G:464         | G:582,T:2       | G:361,A:5     |    |
| OJ18 | C:583,A:1      | C:448         | C:702,T:3,A:1   | A:949,T:1,G:1   | A:667,G:1      | C:484,T:1    | T:580          | G:628         | G:793,A:1,T:1   | G:520,A:4     |    |
| OJ19 | C:520          | C:499,A:1,T:1 | C:842,T:6       | A:836,C:1       | A:605,G:7      | C:547,T:1    | T:744,C:1      | G:704,A:2     | G:902,A:1,T:1   | G:429,A:2     |    |

|      |               |           |                  |                 |                 |                |                |                |                 |                |    |
|------|---------------|-----------|------------------|-----------------|-----------------|----------------|----------------|----------------|-----------------|----------------|----|
| OJ22 | C:740,T:1     | C:673     | C:1117,T:3,A:1   | A:1238,G:1      | A:931,G:2       | C:666,T:1      | T:985,A:2      | G:975,A:1      | G:1308,T:1      | G:635,A:2,TC:3 |    |
| OJ24 | C:793         | C:629,T:1 | C:1005,T:7,G:1   | A:1311,T:1,C:1  | A:944,G:7,C:1   | C:701,T:1      | T:897,A:1,C:1  | G:890,A:1,T:1  | G:1108,A:2,T:1  | G:707,T:2      |    |
| OJ25 | C:1033,T:1    | C:718,T:2 | C:1136,T:3       | A:1568,T:1      | A:1105,G:5,TC:2 | C:706          | T:992,C:2      | G:1037,A:1,T:1 | G:1416,A:1      | G:838,C:1      |    |
| OJ26 | C:798,T:2     | C:596     | C:950,T:4        | A:1255          | A:877,G:1       | C:680          | T:742,A:1,C:1  | G:832          | G:1037          | G:641,A:6,T:1  |    |
| OJ28 | C:479         | C:462     | C:834,T:11,A:1   | A:871,G:1       | A:682,G:2       | C:518,T:1      | T:764,C:2      | G:816          | G:931,T:1       | G:549          |    |
| OJ30 | C:916         | C:639     | C:1068,T:3       | A:1399,C:1,G:1  | A:944           | C:648,A:2      | T:901,C:1,G:1  | G:927,A:1      | G:1222          | G:756,A:2      |    |
| OJ31 | C:1067,T:1    | C:820,T:1 | C:1351,T:8,G:2   | A:1837,G:3      | A:1226,G:1      | C:859,A:1      | T:1167,A:2,C:1 | G:1134,T:1     | G:1499,A:2      | G:979,A:1      |    |
| OJ32 | C:387,A:1     | C:276     | C:575,T:4        | A:721           | A:538,G:2       | C:295          | T:474,C:1      | G:429,A:1      | G:600           | G:479,A:1      |    |
| OJ33 | C:764         | C:537     | C:847,T:5,A:2    | A:1163          | A:838,G:2       | C:530          | T:761          | G:702,A:2      | G:1041,A:1      | G:579,A:7,C:1  |    |
| OJ34 | C:1125,T:1    | C:761     | C:1263,T:15,AG:3 | G:1630,A:20,T:2 | A:1284,G:5      | C:804,A:1,TG:2 | T:1147,C:1     | G:1163         | G:1405,A:4,TC:2 | G:991,A:2      |    |
| RA01 | C:100         | C:84,T:1  | C:132,A:1        | G:97,A:2        | A:143           | C:126,T:2      | T:116,C:2      | G:170          | G:143,A:3       | G:123,A:1      |    |
| RA03 | C:88,T:1      | C:89,T:2  | C:132,T:1        | A:150,G:2       | A:140,G:2,C:1   | C:140,T:2      | T:114,C:1      | G:135,A:3      | G:125,A:1       | G:110,A:4      |    |
| RA04 | C:139,T:2     | C:87,T:2  | C:176,T:3        | A:149,G:1       | A:190,G:3       | C:169,T:2      | T:162,C:1      | G:162,A:1      | G:151,A:1       | A:164,G:29     |    |
| RA05 | C:49,T:3      | C:48      | C:57,T:1         | A:54,G:2        | A:59,G:1        | C:54           | T:54           | G:60,A:1       | G:65            | G:55           |    |
| RA07 | C:153,T:1     | C:155     | C:191,T:2        | G:193,A:10,C:1  | A:228,G:2       | C:174,T:2      | T:181,C:2,G:2  | G:186          | G:207           | G:169,A:1      |    |
| RA08 | C:93          | C:45,T:1  | C:106,T:1        | G:94,A:5        | A:103,G:4       | C:90,T:2       | T:82,C:3       | G:109,A:3      | G:111,A:2       | G:81,A:2       |    |
| RA10 | C:114,A:1,T:1 | C:129,T:2 | C:190,T:1        | A:135,G:2       | A:173,G:2       | C:144,T:3      | T:164,C:2,A:1  | G:183,A:1      | G:187,A:2       | G:115,A:2      |    |
| RA11 | C:87,T:2      | C:75,T:2  | C:130,T:5        | A:135,G:2,C:1   | A:138,G:4       | C:127,T:3      | T:119,C:1      | G:122          | G:161           | A:144,G:2      |    |
| RA12 | C:141         | C:85      | C:150            | A:161           | A:145,G:3       | C:118          | T:110          | G:123,A:2      | G:159,A:2       | A:152,G:1      |    |
| RA14 | C:126,T:1     | C:83      | C:161,T:1        | G:154,A:4       | A:160,G:2       | C:119,T:1      | T:155,C:1      | G:123,A:2      | G:156           | G:133,A:3      |    |
| RA15 | C:214         | C:150     | C:207            | A:194,G:1       | A:199,G:3       | C:178,T:1      | T:195          | G:180,A:4      | G:250,A:3       | A:181,G:3      |    |
| RA16 | C:415,T:1     | C:293     | C:543,T:2        | G:421,A:3       | A:518,G:1       | C:433,A:1      | T:455,C:2      | G:451          | G:551,A:1,C:1   | G:429,A:6      |    |
| RA19 | C:81          | C:63,T:1  | C:99             | A:127,T:1,G:1   | A:100,G:3       | C:61           | T:97,C:2       | G:87           | G:112,A:1       | G:101,A:2      |    |
| RA22 | C:167,T:1     | C:123,G:1 | C:202,T:4        | G:196,A:3       | A:203,G:1       | C:158,T:1      | T:137,C:3      | G:172,T:2      | G:192           | A:193,G:2      |    |
| RA23 | C:92,A:1      | C:58      | C:112,T:2        | G:86,A:1        | A:132,G:2       | C:107,T:1      | T:116          | G:104,A:3      | G:113,A:1       | G:85,A:1       |    |
| RA25 | C:136,T:2     | C:140,T:1 | C:195            | G:193,A:5       | A:218,G:5       | C:160          | T:199          | G:211,A:3      | G:268,A:4       | G:234,A:64     | IS |
| RA26 | C:88          | C:77      | C:99,T:5         | G:98,A:5,T:1    | A:120,G:5       | C:100          | T:118,C:2      | G:117,A:3      | G:150,A:4       | G:109,A:2      |    |
| RA27 | C:112,T:1     | C:78,T:1  | C:115,T:6        | A:108,G:1       | A:156,G:4       | C:94,T:2       | T:132,C:4      | G:132,A:2      | G:153,A:2       | G:142,A:1      |    |
| RA30 | C:97,A:1      | C:65,T:1  | C:89,T:1         | G:103,A:5       | A:135,G:4       | C:77,T:5       | T:80,C:3       | G:119,A:1      | G:137,A:1       | G:110,A:2      |    |
| RA31 | C:207,T:3     | C:161,T:1 | C:218,T:4        | G:242,A:6       | A:232,G:7       | C:146          | T:214,C:5      | G:204,A:2      | G:306,A:4       | G:225,A:4      |    |
| RA33 | C:89,T:2      | C:83,T:1  | C:113,T:6        | A:147,G:2       | A:122,G:3       | C:89,T:1       | T:123          | G:107,A:1      | G:134,A:1       | G:140          |    |
| RA36 | C:138         | C:106     | C:180,T:1        | G:216,A:6,TC:2  | A:174,G:2       | C:97,T:2       | T:146,C:1      | G:161,A:2      | G:252,A:5       | G:209,A:2      |    |
| RA38 | C:144,T:1     | C:126     | C:184,T:7        | G:180,A:5       | A:184,G:7       | C:126,T:1      | T:191,A:1,C:1  | G:172,A:1      | G:217,A:2       | G:196,A:2      |    |

|      |               |           |              |               |                |               |               |                |               |                |  |
|------|---------------|-----------|--------------|---------------|----------------|---------------|---------------|----------------|---------------|----------------|--|
| RA39 | C:208         | C:135     | C:277,T:2    | A:320         | A:215,G:6      | C:189,T:1     | T:252,A:1     | G:172          | G:286,A:2     | G:234,A:3      |  |
| RA43 | C:53,A:1      | C:47,T:1  | C:64,T:2     | G:88,A:4      | A:73,G:5       | C:41,T:2      | T:61          | G:66,A:2       | G:91,A:1      | A:112,G:2      |  |
| RA44 | C:108,T:1     | C:82,T:4  | C:124        | A:131,G:3     | A:141          | C:99,T:2      | T:138,C:2     | G:155,A:3      | G:140,A:4     | A:158,G:1      |  |
| RA45 | C:169         | C:134     | C:196,T:1    | G:156,A:2     | A:205,G:2      | C:217         | T:190,C:1     | G:223,A:1      | G:265,A:3     | G:161,C:1      |  |
| RA46 | C:221,T:2     | C:168     | C:274,T:2    | A:335,G:5,C:1 | A:329,G:1      | C:182,T:1     | T:240,C:3     | G:223          | G:355,A:2     | G:320,A:1      |  |
| RA47 | C:92          | C:81      | C:98,T:6     | A:154,G:3     | A:145,G:4      | C:86,T:3      | T:130,C:1     | G:121,A:2      | G:181,A:2     | G:163,A:3      |  |
| RA48 | C:191         | C:147,T:3 | C:220,T:2    | G:215,A:4,T:1 | A:229,G:7      | C:149,T:1     | T:189,C:5     | G:196,A:4      | G:247,A:1     | G:230          |  |
| RA51 | C:137,A:1,T:1 | C:119     | C:185,T:2    | G:158,A:1     | A:165          | C:156,T:1     | T:148         | G:146,A:1      | G:187,A:1     | A:177,G:4      |  |
| RA52 | C:132,T:1     | C:91,T:1  | C:162,T:2    | A:208,G:1     | A:145,G:1      | C:122         | T:123,C:1     | G:126,C:1      | G:181,A:2,C:1 | A:214          |  |
| RA53 | C:151,T:4     | C:112,T:2 | C:158,T:5    | G:189,A:6     | A:192          | C:136,T:2,G:1 | T:167         | G:165,A:3      | G:217,A:3     | G:177,A:2      |  |
| RA54 | C:162,T:1     | C:146,T:1 | C:181,T:3    | A:250         | A:213,G:4      | C:145,T:1     | T:164,C:2     | G:170,A:1      | G:236         | A:266,G:2      |  |
| RA55 | C:110,T:3     | C:81      | C:151,T:5    | A:213,G:4     | A:142,G:3      | C:88          | T:125,C:3     | G:137,T:1      | G:177,A:2     | A:209,G:2      |  |
| RA56 | C:61,T:1      | C:42,T:1  | C:80,T:1     | A:85,G:2      | A:66           | C:74,T:2      | T:71          | G:55,A:2       | G:79,A:1      | G:70,A:1       |  |
| RA58 | C:77,T:2      | C:71,T:1  | C:90         | A:115         | A:93,G:2       | C:61,T:1      | T:75          | G:100,A:1      | G:140,A:1     | A:105,G:1      |  |
| RA61 | C:26          | C:32      | C:52,T:1     | G:57          | A:49,G:2       | C:49          | T:42,C:1      | G:47           | G:53,A:1      | G:54,A:1       |  |
| RA63 | C:118,T:1     | C:78,T:1  | C:132,T:1    | A:181,G:4     | A:131,G:4      | C:92          | T:136,C:2     | G:116          | G:146,A:2     | A:150,G:2      |  |
| RA64 | C:92,T:3      | C:84      | C:134,T:1    | A:135         | A:120,G:3      | C:91,T:1      | T:107,C:2     | G:106,A:2      | G:162,A:2     | A:137,G:2      |  |
| RA66 | C:40          | C:41,T:2  | C:67,T:6,A:1 | G:58,A:6      | A:72,G:1       | C:53,T:4      | T:47,C:4      | G:60,A:3       | G:86,A:4      | G:80,A:4       |  |
| RA67 | C:71,T:2      | C:53      | C:74,T:2     | A:110,G:1     | A:77,G:5       | C:54,T:1      | T:59,C:1      | G:62,A:6       | G:83,A:5      | G:98,A:4       |  |
| RA68 | C:229,T:1     | C:180     | C:288,T:5    | A:360         | A:332,G:3      | C:230,T:1     | T:260         | G:244,A:4      | G:373,A:2     | G:326,A:2      |  |
| RA69 | C:229,T:2     | C:186,T:3 | C:273,T:1    | A:286,G:2     | A:345,G:6      | C:225,T:2     | T:289,C:4,G:1 | G:280,A:1      | G:357,A:2     | G:436,A:13,C:1 |  |
| RA70 | C:127,T:1     | C:110,T:1 | C:165,T:3    | G:173,A:5     | A:209,G:3      | C:111,T:1     | T:171,C:2,G:1 | G:153,A:2      | G:244,A:2     | A:284,G:3      |  |
| RA71 | C:97          | C:79      | C:138,T:1    | G:136,A:7     | A:167,G:4      | C:95,T:1      | T:126,C:1     | G:143          | G:143,A:2     | G:170,A:4      |  |
| RA72 | C:52,T:1      | C:55,T:2  | C:93,T:1     | A:120,G:2     | A:115,G:3      | C:64          | T:93          | G:86           | G:145,A:1     | G:119,A:6      |  |
| RA74 | C:168,T:2     | C:135,T:4 | C:218        | A:218,G:3     | A:217,G:9      | C:161,T:2     | T:185,C:6     | G:193,A:3      | G:257,A:6     | A:292,G:6      |  |
| RA75 | C:49          | C:37,T:1  | C:54,T:1     | A:66,T:1,G:1  | A:55           | C:55,T:1      | T:42,C:1      | G:51           | G:87,A:1,C:1  | G:72,A:11      |  |
| RA76 | C:187,T:3     | C:166,T:4 | C:288,T:2    | A:293,G:1     | A:239,G:2      | C:182,T:3     | T:244,C:3     | G:232,A:1      | G:357,A:2     | G:279,A:5      |  |
| RA77 | C:154         | C:127,T:1 | C:217,T:1    | A:266,G:1     | A:237,G:4      | C:136,T:1,G:1 | T:179,C:1     | G:160,A:3,T:1  | G:251,A:1     | G:269,A:1      |  |
| RA79 | C:63,T:1      | C:50,T:1  | C:83,T:6     | A:94,G:3      | A:96,G:5       | C:73,T:1      | T:89,C:2      | G:73,A:4       | G:90,A:4      | G:103,A:1      |  |
| RE01 | C:950,T:4     | C:723,T:2 | C:1445,T:1   | A:1303,C:1    | A:1089,G:5,T:1 | C:1146        | T:1175        | G:1091,A:3,T:1 | G:1220,A:4    | G:731,A:4,C:1  |  |
| RE02 | C:137         | C:141     | C:359,T:1    | A:281         | A:288          | C:446         | T:457,C:1     | G:384,A:1      | G:467         | A:195,G:1      |  |
| RE03 | C:267         | C:240     | C:399        | A:413,G:1     | A:299          | C:320         | T:361,C:1     | G:344          | G:353,T:1     | G:246,A:1      |  |
| RE04 | C:281         | C:207     | C:338,T:3    | G:300,A:7,C:1 | A:268,G:4      | C:305,T:1     | T:278,G:1     | G:315          | G:287,A:1,T:1 | G:178,A:3      |  |

|      |               |               |                 |                 |                 |                |                |                 |                |                 |  |
|------|---------------|---------------|-----------------|-----------------|-----------------|----------------|----------------|-----------------|----------------|-----------------|--|
| RE05 | C:273,A:1     | C:276         | C:468,T:4       | A:463           | A:410,G:1       | C:438,T:1      | T:492          | G:431,A:2       | G:508          | A:259           |  |
| RE07 | C:1492,A:1    | C:1194,A:3    | C:1918,A:2,T:1  | A:1924,C:1,G:1  | A:1575          | C:1518,A:1,T:1 | T:1699,C:2     | G:1703,A:1      | G:1894,T:7     | G:1240,A:16,T:1 |  |
| RE08 | C:328,T:2     | C:221,T:1     | C:414,T:5       | A:521           | A:373,G:3       | C:328,T:1      | T:358,C:1      | G:385,A:1       | G:387,A:1      | G:259,A:1       |  |
| RE09 | C:259,T:2     | C:306,T:5     | C:420,T:24      | A:425,G:1       | A:381,G:13      | C:309          | T:333,C:1      | G:407,A:7       | G:410,A:2      | G:239,A:1       |  |
| RE10 | C:642,T:6,A:1 | C:516,T:6,G:1 | C:781,T:10      | G:794,A:10,C:1  | A:658,G:10      | C:690,A:1      | T:663,A:2,C:1  | G:706,A:3,C:1   | G:787,A:4      | A:514,G:2       |  |
| RE11 | C:322         | C:341         | C:496,A:3       | A:513,G:2,T:1   | A:440           | C:381          | T:435,C:2      | G:477           | G:473,A:1      | G:293           |  |
| RE12 | C:536,A:1     | C:411,T:2     | C:1548,T:12,A:1 | G:1173,A:9,T:1  | A:1251,G:9,C:1  | C:740          | T:1576,A:2,C:1 | G:1611,A:2,T:1  | G:1848,A:4     | G:771,A:5,C:2   |  |
| RE13 | C:729,T:3,A:2 | C:602         | C:1001,T:4,A:1  | A:1077,G:3,TC:2 | A:946,C:1       | C:817          | T:940,C:1      | G:1028,C:1      | G:1050,T:1,C:1 | A:673,G:2       |  |
| RE14 | C:837,A:1,T:1 | C:593,T:2     | C:1075,T:4      | A:1145,C:1      | A:1064,G:2      | C:877          | T:965,G:1      | G:1030,A:1,C:1  | G:1098,A:2,T:2 | A:713           |  |
| RE15 | C:588,A:1,T:1 | C:676         | C:989,A:1,T:1   | G:745,A:3,T:1   | A:819,G:2       | C:1123,A:2     | T:1246,A:1     | G:1207          | G:1237,T:2,A:1 | A:725,G:2,C:1   |  |
| RE16 | C:571,A:1     | C:509,T:3     | C:816,T:6       | A:751,G:1       | A:601,G:4       | C:622          | T:707          | G:764,A:2,T:2   | G:752,A:1      | G:476,A:35,C:1  |  |
| RE17 | C:639         | C:438,T:4     | C:849,T:2       | A:876           | A:765,C:2,G:2   | C:640,A:1,T:1  | T:769,G:1      | G:705,A:4,T:1   | G:788,A:2,T:1  | G:545,A:2,T:1   |  |
| RE18 | C:790,T:2,A:1 | C:678,T:2     | C:1134,T:8,A:1  | G:1096,A:3,T:3  | A:963,G:7,C:1   | C:906,T:1      | T:941,C:1      | G:1042,A:1,TC:2 | G:1073,A:1     | G:735,A:5,C:1   |  |
| RE19 | C:293,T:2     | C:275,T:3     | C:459,T:5       | A:423,T:1,G:1   | A:433,G:2       | C:355          | T:387,G:2      | G:439           | G:439,A:1,T:1  | A:347           |  |
| RE20 | C:168         | C:262,T:4,G:1 | C:751,T:13,A:2  | G:226,A:2       | A:451,G:7       | C:633          | T:1201,C:1     | G:922,A:1       | G:1063,T:2,A:1 | G:193,A:2       |  |
| RE21 | C:746,A:2,T:1 | C:598,G:1     | C:1012          | A:965           | A:808,G:1       | C:759          | T:955          | G:947,A:1       | G:968,T:1      | G:633,A:5       |  |
| RE22 | C:328         | C:269         | C:468,T:3       | A:497,G:1       | A:410,G:1       | C:362,A:1,T:1  | T:430          | G:415,A:1       | G:460,A:4      | A:335,G:1       |  |
| RE23 | C:392         | C:524,A:1     | C:847,T:4,AG:2  | A:712           | A:724,G:2,C:1   | C:864          | T:991,A:1,C:1  | G:908           | G:994,T:1      | G:434,A:2       |  |
| RE24 | C:602,T:1     | C:464         | C:763,T:7       | A:752,G:6       | A:585,G:4       | C:580,A:2,T:1  | T:656,C:2      | G:688,A:1       | G:767,A:2,T:1  | A:531,G:6,T:1   |  |
| RE25 | C:305         | C:225         | C:380,T:2,A:1   | G:412,A:2       | A:365,G:3,C:1   | C:352          | T:379,C:1      | G:327           | G:374          | G:255,A:1       |  |
| RE26 | C:923,A:1     | C:725,G:1     | C:1088,T:5,A:1  | G:1073,A:6,C:2  | A:1066,C:1      | C:969,T:1      | T:978,G:1      | G:1093,T:1,C:1  | G:1212,A:1     | G:716,A:5       |  |
| RE27 | C:920,T:1     | C:729,T:2,A:1 | C:1173,T:8,A:1  | G:1162,A:4      | A:1041,G:11,T:1 | C:828          | T:950,C:2,AG:2 | G:1051,A:1,T:1  | G:1111,A:1,T:1 | A:769,G:2,C:1   |  |
| RE28 | C:602,A:2,G:1 | C:551,A:1,G:1 | C:787,T:3       | A:718,C:1       | A:762           | C:630          | T:623,A:1,C:1  | G:762,A:1       | G:720          | G:500,A:2       |  |
| RE29 | C:746,T:2,A:1 | C:541         | C:1312,T:8,A:1  | A:1119,C:1,G:1  | A:1089,G:3      | C:1034         | T:1232,C:1     | G:1144,A:5      | G:1301,C:2,A:1 | G:745,A:5,T:1   |  |
| RE30 | C:831,A:2     | C:540         | C:942,T:2,A:1   | G:1021,T:1,C:1  | A:857,G:2       | C:718,A:1      | T:844,G:2,C:1  | G:874           | G:958,T:2,C:1  | A:638,C:1,G:1   |  |
| RE31 | C:607         | C:438,T:2     | C:892,T:11,G:1  | G:852,A:4       | A:751,G:6       | C:682,T:1      | T:789          | G:744           | G:789,T:1      | G:581,A:1       |  |
| RN51 | C:441,T:3     | C:325,T:3     | C:592,T:4,A:1   | A:549           | A:462,G:2       | C:435          | T:448          | G:377,A:2,C:1   | G:590,A:1      | A:347           |  |
| RN52 | C:593,T:2,A:1 | C:492,T:1     | C:849           | A:856,C:1       | A:611,G:4       | C:632          | T:700          | G:662,A:1,T:1   | G:825          | A:549           |  |
| RN53 | C:474,T:5     | C:438,T:2     | C:676,A:1       | A:663           | A:529,G:6       | C:487          | T:667,A:1,G:1  | G:534,A:1       | G:640,A:3      | A:463           |  |
| RN54 | C:307,T:1     | C:401         | C:540,T:2       | A:565           | A:496           | C:491          | T:504,C:2      | G:481,T:2       | G:536,A:1,T:1  | A:408,G:2       |  |
| RN55 | C:462,A:1     | C:508,T:4     | C:783,T:4,A:1   | A:716,C:1,G:1   | A:592,G:1       | C:622          | T:667,C:1      | G:575,T:1       | G:738,A:4      | G:392,A:1,T:1   |  |
| RN56 | C:428         | C:674         | C:1065,T:3      | G:809,T:1       | A:740,G:2,T:1   | C:939,T:3      | T:1005,G:1     | G:800,T:1,C:1   | G:986,C:1      | G:495           |  |
| RN57 | C:265,T:1     | C:365         | C:564,T:4       | A:556,G:2       | A:422,G:6       | C:494          | T:553,G:1      | G:469,A:3       | G:534,A:3      | G:290,A:2       |  |

|       |                |                |                 |                 |                 |                 |                 |                |                 |                  |  |
|-------|----------------|----------------|-----------------|-----------------|-----------------|-----------------|-----------------|----------------|-----------------|------------------|--|
| RN58  | C:81,T:1       | C:46,T:2       | C:93,T:1        | A:143,G:2       | A:101,G:4       | C:42,T:1        | T:117,C:1       | G:89,A:4       | G:97,A:3        | A:99,G:1         |  |
| RUL01 | C:223          | C:336          | C:438,T:1       | A:392           | A:277,G:3       | C:486           | T:482           | G:473          | G:434           | G:168            |  |
| RUL02 | C:401,A:1,T:1  | C:387,T:2,A:1  | C:1251,T:9,A:1  | A:891           | A:827,G:7,C:1   | C:749,T:1       | T:1246,A:3      | G:1152         | G:1296,A:2      | G:533,A:4,T:1    |  |
| RUL03 | C:462,A:1      | C:568          | C:1015,T:2      | G:586           | A:744,G:1       | C:964,A:4       | T:989,A:1,CG:2  | G:914,A:1,T:1  | G:1028          | G:484,A:8        |  |
| RUL04 | C:833,G:2      | C:726          | C:1107,T:15     | A:1009          | A:896,G:1       | C:1009          | T:995,C:1       | G:982,T:4,A:2  | G:1142,T:2,AC:2 | G:630,A:5,T:1    |  |
| RUL05 | C:243,T:5      | C:277,T:6,A:1  | C:440,T:14,A:1  | G:336,A:5       | A:356,G:8       | C:387,T:1,G:1   | T:359           | G:415,A:9      | G:449,A:3       | G:230,A:2,T:1    |  |
| RUL06 | C:183          | C:149          | C:225,T:3       | G:201,A:3       | A:219,G:1       | C:192,A:1       | T:186           | G:177          | G:232           | G:137,A:3        |  |
| RUL07 | C:259          | C:642,T:1      | C:695,A:1       | G:251,A:157     | A:567,G:1       | C:830           | T:655,C:1       | G:780,A:1      | G:979,A:2       | G:267,A:2,C:1    |  |
| RUL09 | C:345,T:3,A:1  | C:256          | C:435,T:5       | G:520,A:3       | A:385,G:3       | C:376,T:1       | T:385           | G:375          | G:446,T:1       | G:268,A:5        |  |
| RUL10 | C:192          | C:354,T:1      | C:898,T:5,A:1   | G:519,A:3,T:1   | A:587,G:7,T:1   | C:734,G:1       | T:1344          | G:1152,A:8,C:1 | G:1349,A:1      | G:428,A:5        |  |
| RUL11 | C:694          | C:842,A:1      | C:1529,T:9      | A:926           | A:1053,G:3      | C:1622,A:2,TG:2 | T:1476          | G:1487,T:1     | G:1613,C:1      | G:461,A:4,T:1    |  |
| RUL12 | C:1307,T:1     | C:1074         | C:1699,T:8,AG:3 | A:1611,C:3      | A:1452,G:1      | C:1457,A:2,T:1  | T:1470,C:3,A:2  | G:1596,T:1     | G:1634,A:2,TC:2 | G:976,A:9,T:2    |  |
| RUL13 | C:845,T:3,A:1  | C:1010,A:2,T:1 | C:1348,T:7      | A:1259,G:2      | A:1066,G:5      | C:1227,A:1,T:1  | T:1155,A:1,C:1  | G:1249,A:2,T:1 | G:1207,A:4      | G:685,A:9,T:2    |  |
| RUL14 | C:910,G:1      | C:769          | C:1200,T:1      | A:1148,T:1      | A:967,G:4,C:1   | C:942           | T:978,C:1       | G:1078         | G:1068,T:1      | G:675,A:3        |  |
| RUL15 | C:2007,T:2,A:1 | C:1532,T:4,G:1 | C:2642,T:13     | G:2439,A:3,TC:2 | A:2195,G:9,C:2  | C:2043,A:1      | T:2074,A:1,C:1  | G:2110,A:3,T:1 | G:2377,A:5      | G:1463,A:31,TC:3 |  |
| RUL16 | C:636          | C:525          | C:814,T:3,A:1   | A:739,G:36      | A:708,G:2       | C:685           | T:697,G:1       | G:785          | G:801           | G:475,A:4        |  |
| RUL17 | C:332,T:1      | C:256,T:4      | C:527,T:3       | G:352,A:4       | A:440,G:2       | C:544,A:1       | T:576,G:1       | G:521,A:5,T:2  | G:588,A:3,T:1   | G:332,A:3        |  |
| RUL18 | C:269          | C:243          | C:510           | A:335           | A:386           | C:478,A:1       | T:533,C:2       | G:447,A:1      | G:533           | G:273,A:2        |  |
| RUL19 | C:800,A:1      | C:518,A:2      | C:1002,T:3,A:2  | G:1001,A:3,T:1  | A:874,G:4       | C:756,T:1       | T:818           | G:925,A:1      | G:883,T:1       | G:565,A:3        |  |
| RUL20 | C:552,A:1,T:1  | C:668,T:1      | C:933,T:14,A:2  | G:736,A:2,T:1   | A:753,G:7       | C:819           | T:739           | G:853          | G:871,A:7,T:3   | G:495,A:4        |  |
| RUL22 | C:2443,A:3     | C:2333,A:2,T:2 | C:3255,T:13,A:3 | A:3175,G:2,TC:2 | A:2995,G:11,C:1 | C:2750,A:2,GT:3 | T:2547,C:3,GA:5 | G:3149,A:7,T:7 | G:3151,C:2,AT:2 | G:2099,A:37,TC:4 |  |
| RUL23 | C:346          | C:346          | C:459           | A:474           | A:473,G:3       | C:451           | T:498,G:1       | G:440          | G:466           | G:327,A:4        |  |
| RUL24 | C:420,T:3,A:1  | C:362          | C:536,T:4       | G:557,A:3       | A:508,G:4       | C:442,A:1       | T:499,A:1       | G:519,A:4      | G:476,A:4,T:2   | G:317,A:1,T:1    |  |
| RUL25 | C:332          | C:278          | C:465,A:1,T:1   | A:495,G:2       | A:378           | C:397           | T:401,C:1       | G:416,A:2      | G:400           | G:287,A:2        |  |
| RUL28 | C:264,T:1      | C:395          | C:599,T:2       | A:385           | A:449,G:6       | C:508           | T:522,G:1       | G:503          | G:595,A:1       | G:220,A:4        |  |
| RUL29 | C:595          | C:515          | C:711,T:4       | A:658,G:1       | A:608,G:2,T:1   | C:615,A:1       | T:674,A:1,C:1   | G:682,A:1      | G:682,A:1,C:1   | G:410,T:2,A:1    |  |
| RUL30 | C:289,T:26     | C:435,T:47     | C:520,T:54,A:2  | A:434           | A:419,G:42      | C:557,T:56,A:1  | T:527,C:59      | G:464,A:51,T:1 | G:595,A:65      | G:238,A:3        |  |
| RUL32 | C:468          | C:429,T:1      | C:593,T:5       | G:498,A:145     | A:570,C:1       | C:539           | T:504           | G:505,A:1,T:1  | G:598,T:1       | G:380            |  |
| RUL33 | C:235          | C:227          | C:400           | A:384           | A:259           | C:385,A:1       | T:434,C:1       | G:376          | G:467           | A:253            |  |
| RUL34 | C:197          | C:330          | C:582,T:1,G:1   | A:449,G:1       | A:413           | C:613,T:1,G:1   | T:692,C:2       | G:546          | G:679,T:1       | G:247,A:3        |  |
| RUL35 | C:589          | C:652,T:2      | C:850,T:7,G:1   | A:760,G:1       | A:712,G:3       | C:813,T:1       | T:797,A:2       | G:945,A:1,C:1  | G:926           | G:480,A:3        |  |
| RUL36 | C:841,T:2      | C:743,T:4      | C:1241,T:6,A:1  | A:1191          | A:1059,G:6      | C:1006          | T:1076,A:1,C:1  | G:1093,A:3,T:1 | G:1150,A:6,T:1  | G:667,A:20       |  |
| RUL37 | C:344          | C:336          | C:822,T:16,AG:2 | A:682           | A:617,G:3       | C:751,A:2,T:1   | T:864           | G:846          | G:934           | G:345,A:12,T:1   |  |

|       |               |               |                |                 |               |                |                |                |                |               |  |
|-------|---------------|---------------|----------------|-----------------|---------------|----------------|----------------|----------------|----------------|---------------|--|
| RUL38 | C:518         | C:460,T:1     | C:715,A:1      | A:836,C:1       | A:600,C:1     | C:609,T:1      | T:624          | G:658,T:1      | G:694,T:1      | G:445,A:7     |  |
| RUL40 | C:753         | C:648,T:2,G:1 | C:962          | A:1020,G:1      | A:931,T:1     | C:1025         | T:1033         | G:1051,T:1,C:1 | G:1076         | G:623,A:3,T:1 |  |
| RUL41 | C:215         | C:227         | C:558,T:3      | A:384           | A:385,G:2     | C:591          | T:836,A:1      | G:644          | G:860,T:2      | G:206,A:1     |  |
| RUL42 | C:321,G:1     | C:411         | C:1169         | A:711,G:1       | A:784,T:1,G:1 | C:783,T:1      | T:1338,A:1     | G:1154         | G:1283,A:5,T:2 | G:348,A:3     |  |
| RUL44 | C:479         | C:422         | C:654,T:1      | A:691,G:1       | A:582         | C:563          | T:570          | G:576,A:1      | G:593,A:1      | G:402,A:2     |  |
| RUL46 | C:362         | C:374         | C:578,A:1,T:1  | G:563,T:2,A:1   | A:487,G:4     | C:527          | T:521,A:1      | G:546,T:2      | G:589          | G:333,A:10    |  |
| RUL47 | C:456,A:1     | C:393         | C:634,T:1,G:1  | A:622           | A:490,G:3     | C:526          | T:545          | G:577          | G:600          | G:342,A:6     |  |
| RUL49 | C:575         | C:642         | C:1149,T:1     | A:909           | A:868         | C:1198         | T:1209,C:1     | G:1256,A:2,C:1 | G:1248,A:1     | G:531,A:7,C:1 |  |
| RUT02 | C:286         | C:348,T:1     | C:481          | A:409           | A:368,G:1     | C:506          | T:491,C:1      | G:364          | G:489,A:1      | G:253,A:1,T:1 |  |
| RUT03 | C:427         | C:737,A:1     | C:1038,A:4,T:4 | A:1122,G:1      | A:778,G:2     | C:674,A:2,T:1  | T:963          | G:781,A:1      | G:903,A:2,C:1  | G:584,A:2     |  |
| RUT04 | C:319         | C:378         | C:540,T:3      | A:497,G:3       | A:406         | C:523,T:1      | T:510,A:2      | G:444          | G:546          | G:293         |  |
| RUT05 | C:199,T:1     | C:287         | C:366          | A:384           | A:324         | C:399,T:1      | T:454          | G:298          | G:461          | G:165         |  |
| RUT06 | C:199,T:1     | C:149         | C:226,T:10,A:1 | G:277,A:5       | A:210,G:5     | C:168          | T:240,C:1      | G:208          | G:222          | G:151         |  |
| RUT07 | C:418         | C:514,T:1     | C:696,A:2      | G:638,A:1       | A:556         | C:645,A:1,TG:2 | T:667          | G:539          | G:659          | G:387,A:6     |  |
| RUT08 | C:104         | C:148         | C:214,T:2      | G:185,C:1       | A:166,G:3     | C:209,A:1,T:1  | T:210          | G:170,A:1      | G:191          | G:102         |  |
| RUT09 | C:162         | C:203         | C:302,T:4,A:1  | G:308           | A:259,G:1     | C:282          | T:287          | G:195          | G:293          | G:178,A:2     |  |
| RUT10 | C:206,A:1     | C:343,A:1     | C:492,A:1,T:1  | G:434,A:1       | A:336,G:2,T:1 | C:477          | T:502          | G:381,A:1      | G:543          | G:249,A:4     |  |
| RUT11 | C:112         | C:152         | C:247          | A:267,C:1       | A:176,G:1     | C:155,A:1      | T:225          | G:160          | G:196          | G:134,A:1     |  |
| RUT12 | C:144         | C:163,T:1     | C:305,T:7      | A:332           | A:225         | C:239          | T:255,G:1      | G:181,A:1      | G:199,A:2      | G:145         |  |
| RUT14 | C:330,T:1     | C:302         | C:494,T:4      | G:494,A:6       | A:417,G:2     | C:348          | T:390          | G:319          | G:379          | G:255,A:6     |  |
| RUT15 | C:435         | C:326,T:1     | C:566,T:1      | A:576,G:3,C:1   | A:457,G:2     | C:466,T:2      | T:519          | G:400,A:2      | G:536,A:2      | G:321         |  |
| RUT16 | C:451,G:1     | C:460         | C:830,T:2      | A:801,G:2       | A:561,G:3     | C:590          | T:679,C:1      | G:486,C:1      | G:674,A:1,T:1  | G:386,A:6,T:2 |  |
| RUT17 | C:328         | C:554,T:1     | C:732,T:5      | G:570           | A:584,G:1     | C:665,G:1      | T:729          | G:671,A:2      | G:725          | A:549,G:2     |  |
| RUT19 | C:698,T:2,A:1 | C:834         | C:1306,T:6     | A:1280          | A:1072,G:3    | C:1046,A:3,T:1 | T:1071,A:1,C:1 | G:954,T:1      | G:1114,T:2,A:1 | G:671,A:9     |  |
| RUT20 | C:148         | C:241         | C:393,T:5      | G:242,A:3       | A:219,G:6     | C:282,A:1,T:1  | T:276,C:1      | G:263,A:3      | G:285,A:3      | A:176         |  |
| RUT21 | C:29          | C:57          | C:95           | A:74            | A:65          | C:97           | T:109          | G:82           | G:85           | G:72          |  |
| RUT22 | C:128         | C:230,T:2     | C:293,T:5      | G:204           | A:185,G:1     | C:286          | T:313          | G:266,A:3      | G:309          | A:134,G:2     |  |
| RUT23 | C:156         | C:238         | C:386,T:5,A:1  | G:231           | A:359,G:1     | C:363          | T:467          | G:323          | G:477,A:1      | A:233,C:1     |  |
| RUT24 | C:374         | C:427,T:1     | C:628,T:3      | G:501,A:2       | A:466,G:2,C:1 | C:480          | T:557          | G:457          | G:613,T:1      | G:322,A:8     |  |
| RUT27 | C:584         | C:528,A:1,T:1 | C:845,G:2,AT:2 | A:673,G:148,C:1 | A:635,G:3     | C:624          | T:772          | G:664          | G:834          | G:462,A:96    |  |
| RUT28 | C:271         | C:396,T:3     | C:640,T:1      | G:509,C:1       | A:403         | C:392,T:1      | T:560,C:2      | G:383          | G:479          | A:324         |  |
| RUT29 | C:108         | C:191         | C:218,T:7      | G:216,A:2       | A:199,G:8     | C:238          | T:266          | G:230          | G:222          | G:155,A:3,T:1 |  |
| RUT30 | C:94,A:1      | C:233         | C:330,T:11     | A:326,C:1       | A:251,G:3,C:1 | C:283          | T:333          | G:241,A:1      | G:282          | G:123,A:9     |  |



|      |               |               |                |                 |               |               |               |               |               |               |    |
|------|---------------|---------------|----------------|-----------------|---------------|---------------|---------------|---------------|---------------|---------------|----|
| S03  | C:557         | C:531,T:2,A:1 | C:713,T:4,A:2  | G:509,A:182,C:1 | A:721,G:5     | C:543,T:1     | T:608,C:1     | G:686,A:3     | G:664,A:2     | A:323,G:103   | I  |
| S06  | C:78,T:1      | C:77,T:1      | C:118,T:1      | G:76            | A:73          | C:96,T:1      | T:96          | G:74          | G:113         | G:57,A:1      |    |
| S07  | C:65          | C:59,T:1      | C:86,T:1       | G:48,A:3        | A:66          | C:99,T:1      | T:89          | G:63,A:2      | G:102,A:1     | G:22,A:2      |    |
| S08  | C:53          | C:49          | C:67,T:2       | G:43,A:1        | A:59,G:1      | C:75          | T:82          | G:47          | G:78          | G:29          |    |
| S16  | C:75          | C:67          | C:115          | G:101,A:3       | A:74,G:1      | C:89,T:1      | T:101,C:1     | G:76          | G:90          | G:58          |    |
| S20  | C:105         | C:58          | C:98           | G:96,A:3        | A:99,G:1      | C:99          | T:67,C:1      | G:84,A:2      | G:138         | G:89          |    |
| S21  | C:73          | C:58,T:1      | C:86,T:2       | A:75            | A:70          | C:64          | T:86          | G:62          | G:77          | G:54          |    |
| S23  | C:54,T:1      | C:64,T:1      | C:97           | G:61,A:1        | A:80          | C:88          | T:80          | G:41,T:1      | G:79          | G:53          |    |
| S27  | C:38          | C:58          | C:91,T:3       | G:85,A:6        | A:71          | C:58          | T:100         | G:50          | G:72          | G:49          |    |
| S30  | C:60          | C:79,T:1      | C:109,T:7,A:1  | A:110,C:1       | A:71,G:1      | C:78          | T:104         | G:83,T:1      | G:102         | A:53,G:1      |    |
| S31  | C:113,T:1     | C:142         | C:226,T:1      | A:88,G:1        | A:153         | C:138,T:1     | T:185,C:1     | G:145         | G:187         | G:94,A:1      |    |
| S32  | C:75          | C:54,T:2      | C:114,T:5      | A:134           | A:60,G:2      | C:79          | T:88          | G:68,A:2      | G:103,A:2     | G:50,A:2      |    |
| S33  | C:84,A:1      | C:57          | C:126,T:1      | G:82,A:1        | A:71          | C:55          | T:72          | G:58          | G:89          | G:67          |    |
| S34  | C:69,G:1      | C:80          | C:146,T:2      | A:60,G:1        | A:94,G:2      | C:140,T:1     | T:126         | G:129         | G:136         | A:96          |    |
| S35  | C:55          | C:57          | C:142,T:4      | G:99,A:5,C:1    | A:90,G:7      | C:59          | T:135         | G:83          | G:80          | G:90          |    |
| SA01 | C:652         | C:569,T:1     | C:703,T:4      | G:604,A:5,TC:2  | A:540,G:2,T:1 | C:831,T:1     | T:706,C:3     | G:673         | G:745,A:2,T:1 | A:435         |    |
| SA02 | C:507,A:1     | C:482         | C:617,T:5,A:1  | A:501           | A:517,G:3     | C:767,T:1     | T:542,C:1     | G:605         | G:666,T:1     | A:399,G:1     |    |
| SA03 | C:435         | C:368         | C:521,T:2      | A:427,C:1       | A:385,G:5     | C:597         | T:490,C:1     | G:412,A:1     | G:528,A:2,T:1 | G:306,A:2     |    |
| SA04 | C:159,T:3     | C:184,G:1     | C:224,T:1      | A:187           | A:173         | C:217,T:2     | T:206         | G:203,A:1     | G:215         | G:110,A:1,T:1 |    |
| SA05 | C:277,T:3     | C:291         | C:391,T:7      | G:306           | A:318,G:1     | C:398,T:1     | T:361         | G:327,A:1     | G:346,A:1     | G:212,A:1     |    |
| SA06 | C:716         | C:550,T:1     | C:797,A:3,T:2  | G:646,A:1,T:1   | A:668,G:5     | C:873,T:2     | T:769,C:2     | G:662,T:2     | G:916,A:1     | G:501,A:6     |    |
| SA07 | C:495         | C:522,T:1     | C:751,A:2,T:1  | A:544,C:1       | A:416         | C:757         | T:636,C:1     | G:623,T:1     | G:677         | G:182,A:156   | IS |
| SA09 | C:271         | C:251,T:2     | C:374,T:1      | A:304,C:1,G:1   | A:273         | C:383,A:1,T:1 | T:345,C:1     | G:340,A:1     | G:410         | G:197         |    |
| SA10 | C:554,A:2     | C:438,T:1     | C:681,T:5      | A:612,G:1       | A:545,G:5     | C:713,T:2,G:1 | T:644,C:2,G:1 | G:564,A:2     | G:690         | G:376,A:1     |    |
| SA12 | C:80          | C:258         | C:322,T:1      | A:108           | A:190,G:1     | C:421,T:4     | T:404         | G:236,A:1     | G:432         | G:121,A:1     |    |
| SA13 | C:417,T:1     | C:372,T:1     | C:579,T:3      | A:518,C:2       | A:478,G:6,C:1 | C:584,T:1,G:1 | T:523         | G:533         | G:609         | G:321,A:4     |    |
| SA15 | C:511         | C:422         | C:612,A:2      | A:445           | A:408         | C:655,A:1,T:1 | T:478         | G:524         | G:653,T:1     | G:322,A:5     |    |
| SA16 | C:149         | C:126,T:1     | C:202,A:1,TG:2 | A:143           | A:118,G:3     | C:192         | T:168,C:6     | G:147,A:4     | G:198,A:6     | G:101         |    |
| SA17 | C:214,A:1,T:1 | C:195         | C:251,T:1      | A:218,C:1       | A:202         | C:293,T:3     | T:276         | G:223         | G:241,T:1     | G:139,A:2     |    |
| SA20 | C:141,G:1     | C:227         | C:302,T:1      | A:189           | A:197,G:1     | C:440         | T:301,C:1     | G:304         | G:431         | G:68,A:1      |    |
| SA21 | C:393,T:1,G:1 | C:321,T:1     | C:468,T:5,A:1  | A:430           | A:400,G:2     | C:477,T:2,A:1 | T:433,C:1     | G:414         | G:533         | G:283,A:7     |    |
| SA22 | C:366,T:1     | C:392         | C:556,T:7      | A:415           | A:402,G:2,C:1 | C:638,T:1     | T:616,C:1,G:1 | G:498,A:2,T:1 | G:641         | G:253,A:11    |    |
| SA23 | C:263         | C:313         | C:344          | G:265,A:1,C:1   | A:215         | C:498         | T:425         | G:343,A:1     | G:389,A:2,T:1 | G:168         |    |

|       |               |               |                 |               |               |                |               |               |               |               |  |
|-------|---------------|---------------|-----------------|---------------|---------------|----------------|---------------|---------------|---------------|---------------|--|
| SA24  | C:293,G:1     | C:404,T:1     | C:485,T:4       | A:298         | A:323,G:1     | C:683,T:3      | T:534         | G:531,A:2     | G:557,A:1     | G:214,A:2     |  |
| SA25  | C:88          | C:76          | C:101,T:3       | A:71          | A:94          | C:94           | T:108         | G:98          | G:130         | G:59          |  |
| SA26  | C:68          | C:89          | C:118,T:1       | A:85          | A:82          | C:121          | T:115         | G:101         | G:109,A:1     | G:41,A:1      |  |
| SA27  | C:87,A:1      | C:103,A:1     | C:97,T:1        | A:93          | A:62          | C:182          | T:167         | G:100         | G:142         | G:31          |  |
| SA28  | C:89          | C:164         | C:146,A:1       | A:107         | A:127         | C:190          | T:195         | G:158,A:1     | G:203,A:1     | G:105,T:1     |  |
| SA31  | C:345         | C:291         | C:449           | A:343         | A:346         | C:502,T:1      | T:436         | G:361         | G:463,A:1,T:1 | G:213,A:3     |  |
| SA32  | C:325         | C:290,T:1     | C:397,T:4,A:1   | A:338,T:1     | A:292,G:1     | C:451,T:1      | T:360,A:1     | G:402,A:1     | G:435,A:1     | A:246,G:2     |  |
| SA33  | C:377         | C:307,T:2     | C:478,T:1       | A:387,G:2     | A:350,G:1     | C:462          | T:385         | G:404,A:2,T:1 | G:479         | G:230,A:2     |  |
| SA34  | C:241         | C:215         | C:347,T:2       | G:247,A:2,T:1 | A:253,G:5,C:1 | C:289          | T:284,C:1     | G:293,A:1     | G:357,A:2     | G:175,A:4     |  |
| SA36  | C:703,A:1     | C:655,A:2,T:1 | C:1051,T:5,AG:4 | A:742,C:1     | A:805,G:3     | C:1037,T:1     | T:929,G:1     | G:937,A:4     | G:1187,A:2    | G:467,A:2     |  |
| SA37  | C:289         | C:250,T:1     | C:402,T:1       | A:337         | A:365,C:1     | C:443,T:2      | T:437         | G:275         | G:458,A:3,T:1 | G:239,A:3     |  |
| SA39  | C:232         | C:211         | C:320,T:2       | A:244         | A:232,G:3     | C:335,A:1      | T:305         | G:259,A:2     | G:279         | G:177,A:6     |  |
| SA40  | C:206         | C:200         | C:257,T:2       | A:238         | A:196         | C:300          | T:262,C:1     | G:230,A:1     | G:293,A:1     | G:147         |  |
| SA41  | C:526,A:1     | C:424,A:1     | C:631,T:2       | G:428,A:5,T:1 | A:483,G:5     | C:723,T:1      | T:654,C:2,G:2 | G:499,A:1     | G:641,A:1,T:1 | G:308,A:2,T:1 |  |
| SA42  | C:593,A:1     | C:538,T:1     | C:657,T:5       | A:563         | A:526,G:3     | C:741,A:1      | T:628,G:2,A:1 | G:629         | G:748,A:3     | G:386,A:5     |  |
| SA43  | C:212         | C:255         | C:333           | G:203         | A:251         | C:399,T:1      | T:298         | G:321,A:1     | G:310,A:1     | A:216,G:3     |  |
| SA44  | C:280         | C:282,A:1,T:1 | C:358           | A:274,G:1     | A:294         | C:412,T:1      | T:390,C:1     | G:287         | G:351         | G:175,A:2     |  |
| SA46  | C:427         | C:363,T:2     | C:530,A:1,TG:2  | G:394,C:2,A:1 | A:395,G:5     | C:487,T:1      | T:444         | G:430,A:1     | G:542,A:1     | G:296,A:1     |  |
| SA47  | C:163         | C:122         | C:225,T:4       | A:135         | A:169         | C:233          | T:201,C:1     | G:167,A:1     | G:209,A:2     | G:117         |  |
| SC04  | C:110         | C:329         | C:427,T:1,G:1   | G:153         | A:336         | C:485,A:1      | T:548,C:1     | G:354         | G:373         | G:164,A:1     |  |
| SC05  | C:126,T:2     | C:148,T:1     | C:190           | A:105         | A:138,G:2     | C:220,T:2      | T:195,C:1     | G:181         | G:178,A:1     | G:80          |  |
| SC17  | C:124,T:1     | C:85,T:2      | C:181           | G:119,A:3     | A:135         | C:194          | T:175         | G:160         | G:180         | G:100,A:2     |  |
| SC20  | C:202,T:2     | C:168         | C:208,T:2       | G:158         | A:175,G:2     | C:221,T:3      | T:217,C:1     | G:234         | G:269,A:2     | G:123         |  |
| SC46  | C:752,A:3,T:1 | C:787         | C:936,T:1       | A:807,C:1,G:1 | A:794,G:2     | C:1062,A:1,T:1 | T:917,C:1     | G:793         | G:979,A:2     | G:539,A:6     |  |
| SCT01 | C:49,T:3      | C:29,T:2      | C:39,T:5        | A:55,G:5      | A:46,G:3      | C:44,T:1       | T:74,C:2      | G:50,A:1      | G:58,A:6      | G:68,A:5      |  |
| SCT02 | C:56,T:3      | C:2           | C:39,T:2        | G:54,A:4      | A:46,G:3,C:2  | C:30,T:1       | T:58,C:6      | G:43,A:1,T:1  | G:34,A:1,T:1  | A:52,G:5      |  |
| SCT03 | C:58          | C:10,G:3      | G:53            | T:83          | T:67          | C:29,A:1       | A:91          | T:63,C:1      | C:71          | C:76          |  |
| SCT04 | C:39,T:4      | C:5           | C:32,T:1        | G:45,A:10     | A:46,G:3      | C:19,T:2       | T:41,C:7      | G:27          | G:39,A:5      | G:47,A:4      |  |
| SCT05 | C:75,T:2      | C:16          | C:59,T:4        | G:77,A:7      | A:65,G:3      | C:46,T:2       | T:103,C:2     | G:70,A:2      | G:85,A:2      | A:86,T:1,G:1  |  |
| SCT06 | C:47,T:3      | C:4           | C:53,T:2        | A:58,G:3      | A:38,G:3      | C:24,T:2       | T:62,C:1      | G:43,A:3      | G:44,A:1      | G:61,A:1      |  |
| TI01  | C:186,T:1     | C:90,T:2      | C:109,T:4       | A:226,G:3     | A:212,G:5     | C:77,T:2       | T:196,C:4     | G:180,A:6     | G:241,A:5,T:1 | G:286,A:3     |  |
| TI03  | C:121,T:1     | C:52,T:2      | C:85,T:2        | G:151,A:3     | A:136         | C:44,T:1       | T:146,A:1,C:1 | G:101,A:2     | G:144,A:6,T:1 | G:102,T:3     |  |
| TI04  | C:63          | C:34,T:4      | C:55,T:2        | G:55,A:6      | A:47,G:2      | C:26           | T:58,C:6      | G:47          | G:73,A:2      | G:50,A:1      |  |

|      |                 |               |                |                 |                |                |                |                |                 |                |   |
|------|-----------------|---------------|----------------|-----------------|----------------|----------------|----------------|----------------|-----------------|----------------|---|
| TI05 | C:98,T:2        | C:9           | C:72,T:1       | G:110,A:5       | A:92,G:4       | C:42,T:1       | T:100,C:3      | G:65,A:2       | G:100,A:3       | G:79,T:1       |   |
| TI06 | C:117,T:2       | C:38          | C:47,T:3       | G:97,A:1        | A:80,G:2       | C:41,T:1       | T:95,C:2       | G:60,A:1       | G:83,A:2        | A:95           |   |
| TI08 | C:88,T:2        | C:11,T:1      | C:68,T:1       | G:80,A:10       | A:101,C:1      | C:44,T:2       | T:91,C:1       | G:71,A:2       | G:84,A:1,T:1    | A:99,G:3       |   |
| TI09 | C:597           | C:419         | C:758,T:3,A:1  | A:962,C:1,G:1   | A:694,G:2      | C:452          | T:695,C:1      | G:732          | G:855,A:1,T:1   | G:636,A:5      |   |
| TI10 | C:340           | C:324         | C:526,T:4      | A:707           | A:525,G:3      | C:366          | T:529          | G:517          | G:602           | G:516,A:3      |   |
| TI12 | C:419           | C:375         | C:536,T:4,A:1  | A:681           | A:469,G:3,C:1  | C:349,T:1      | T:487,C:2      | G:529          | G:673           | G:402,A:2,T:1  |   |
| TI13 | C:322           | C:343         | C:491,T:5,A:1  | G:452,A:6,T:1   | A:371,T:1,G:1  | C:377          | T:546,A:1,G:1  | G:465          | G:596,C:1       | G:300,A:1      |   |
| TI14 | C:712,A:1       | C:642,T:1     | C:850,T:2      | A:1220          | A:862,G:6      | C:578,T:1      | T:831,C:2      | G:988,A:1      | G:1089,A:1,C:1  | G:705          |   |
| TI15 | C:369           | C:319         | C:521,T:6,A:1  | A:502,G:19      | A:382,G:3      | C:434          | T:439,A:1      | G:421          | G:465           | G:227,A:38     |   |
| TI16 | C:916,A:1,T:1   | C:675         | C:1251,T:6     | A:1142,G:1      | A:917,G:3,C:1  | C:961          | T:945          | G:1086,A:2     | G:1094,T:1      | G:679          |   |
| TI17 | C:824,T:4       | C:577,A:1,T:1 | C:973,T:7,A:1  | A:946,G:113     | A:854,G:2      | C:766,T:1      | T:819          | G:934,A:1,T:1  | G:1015,A:4,TC:2 | G:622          |   |
| VL01 | C:770,T:1       | C:517         | C:986,T:3,G:1  | A:1118,G:27,T:1 | A:862,G:2      | C:648,A:2      | T:834,A:1,CG:2 | G:905,A:1      | G:1105,A:1,C:1  | G:698,A:14,C:1 |   |
| VL02 | C:568,A:1       | C:425,T:1     | C:791,T:3      | G:824,A:68      | A:713,G:3      | C:571,T:4      | T:747,C:2      | G:671,A:1      | G:949,A:3,T:1   | G:585,A:23,T:1 |   |
| VL03 | C:565,A:2       | C:481,T:2     | C:744,A:1,T:1  | G:928,A:2,T:1   | A:619          | C:439          | T:527          | G:594,A:1      | G:787           | G:549,A:7,C:1  |   |
| VL05 | C:399           | C:248,A:1,T:1 | C:497,T:5      | G:570,A:8,TC:2  | A:450,G:4,T:1  | C:273          | T:346,G:1      | G:348,A:1      | G:431           | G:314,A:4      |   |
| VL06 | C:435           | C:241,T:1     | C:357,T:5      | A:557,G:1       | A:337,G:1      | C:246          | T:284          | G:333          | G:427,A:1       | G:309,A:2      |   |
| VL08 | C:794           | C:590,A:2,T:2 | C:887,T:6      | A:1153,G:6      | A:851,G:2      | C:554          | T:782,C:1      | G:796,A:1      | G:1024,T:1      | A:391,G:197    | I |
| VL09 | C:471,A:1       | C:493,T:2     | C:754,T:2      | G:781,A:3       | A:705,G:1      | C:485,T:2      | T:550,C:3      | G:695,A:1,T:1  | G:846           | G:499,A:1      |   |
| VL10 | C:597,A:1,T:1   | C:389         | C:731,T:2      | A:890           | A:651,T:1      | C:447,T:1      | T:675,G:1      | G:674          | G:809,A:3       | G:464,A:83     |   |
| VL11 | C:758           | C:524         | C:886,T:5,A:1  | A:1064,G:1      | A:813,G:2      | C:564,T:1      | T:743,A:2      | G:816          | G:1096,A:1,T:1  | A:699          |   |
| VL14 | C:624,A:2,T:1   | C:351,T:2     | C:751,T:5      | G:860,T:2,A:1   | A:684,G:6,C:1  | C:434,T:2      | T:603,A:1,C:1  | G:605,T:1      | G:750,A:1       | G:512,A:5      |   |
| VL16 | C:1205,A:2,TG:2 | C:737         | C:1384,T:2     | G:1802,A:2,TC:2 | A:1281,G:2     | C:862,G:2      | T:1216,C:3     | G:1180,A:1,T:1 | G:1458          | G:1029,A:21    |   |
| VL17 | C:839,G:1       | C:518,T:2,A:1 | C:855,T:5,A:1  | A:1154,G:3      | A:866,G:5      | C:558,T:5      | T:744,C:8,A:1  | G:769,A:1      | G:957,A:3       | G:697          |   |
| VL20 | C:480           | C:306,T:3     | C:580,T:8      | G:701,A:6,C:1   | A:455,G:6      | C:382          | T:457,A:1      | G:440          | G:504           | G:351,A:2      |   |
| VL23 | C:1631,A:1      | C:1062,G:1    | C:1851,T:5,A:1 | A:2527          | A:1805,G:4,T:1 | C:1154         | T:1597,C:2,G:2 | G:1570,T:3,A:1 | G:1965,A:2,T:2  | G:1349,A:23    |   |
| VL24 | C:1427,T:1      | C:927,T:2     | C:1679,T:10    | G:2241,A:4,C:1  | A:1537,G:9     | C:1057,A:1,G:1 | T:1321,C:2     | G:1332,A:2     | G:1746,T:3,C:1  | A:1181,T:1,G:1 |   |
| VL26 | C:572,A:1,T:1   | C:407,T:1     | C:730,T:3,A:1  | A:756           | A:607,G:3      | C:497,A:1      | T:627,C:1      | G:675,A:2      | G:756           | A:547,G:2      |   |
| VL27 | C:419           | C:316,T:1     | C:482,A:1,T:1  | A:570,C:2       | A:453,G:3,TC:2 | C:320          | T:481          | G:398,A:1      | G:582,A:1,T:1   | G:369,A:3      |   |
| VL28 | C:1118,A:1,T:1  | C:833,T:1     | C:1299,A:2,T:1 | G:1475,A:2      | A:1083         | C:878,A:2      | T:1049,C:1     | G:1151,A:2     | G:1506          | A:986,G:3      |   |
| VL29 | C:380           | C:241         | C:410,T:1      | A:558,G:2       | A:392,G:5      | C:302          | T:360,A:1      | G:350,A:1      | G:475,T:1       | G:345,A:2,C:1  |   |
| VL30 | C:497,T:3       | C:311         | C:551,T:9      | A:692,G:2       | A:481,G:3      | C:346          | T:486          | G:477,A:2      | G:625,A:4       | G:393,A:3      |   |
| VL31 | C:432           | C:315         | C:523,T:8,G:1  | G:680,A:51,T:1  | A:514,G:5      | C:339          | T:438,C:2      | G:458          | G:547,A:2,T:1   | G:338,C:1      |   |
| VL32 | C:1415,T:1,G:1  | C:944,T:2     | C:1648,T:7,A:1 | A:2189,G:3,C:1  | A:1535,G:2     | C:1006         | T:1411,C:1     | G:1360,A:1,T:1 | G:1818,A:1,T:1  | G:1082,A:6,T:1 |   |

|      |                |           |                |                |                |               |                |               |                 |                |  |
|------|----------------|-----------|----------------|----------------|----------------|---------------|----------------|---------------|-----------------|----------------|--|
| VL33 | C:532          | C:443     | C:719,T:4      | A:847          | A:734,G:1      | C:452         | T:658,A:1,C:1  | G:653         | G:871,A:1       | G:623,A:1      |  |
| VL34 | C:686          | C:460     | C:870,T:3      | A:989,T:1,C:1  | A:771,G:1      | C:598         | T:769,A:1      | G:724,A:2,T:1 | G:954           | G:741,A:4      |  |
| VL35 | C:728,A:2      | C:382     | C:690,A:2,T:1  | G:921,A:1      | A:716,G:3      | C:451         | T:607,A:1,C:1  | G:621,A:1     | G:841,T:1,C:1   | G:590,A:2,T:1  |  |
| VL38 | C:839,A:1      | C:550,T:1 | C:1005,T:8     | A:1328,G:2,T:1 | A:879,G:2      | C:576,A:1,T:1 | T:779          | G:811,C:1     | G:983           | G:705,A:19,C:1 |  |
| VL39 | C:618          | C:449,A:1 | C:753,T:3,A:1  | G:951,A:5      | A:728,G:3      | C:456         | T:725,A:1      | G:639         | G:768           | A:653          |  |
| VL41 | C:927,A:2,TG:2 | C:634     | C:1223,A:2,T:1 | G:1176,A:3,T:1 | A:1077         | C:753,T:1     | T:1019,A:1     | G:1038,T:3    | G:1235,T:2      | A:950,G:3      |  |
| VL43 | C:752          | C:493,A:1 | C:833,T:4      | G:986,A:8      | A:746,G:2      | C:588,A:1     | T:793          | G:803         | G:906,T:1       | G:625,A:1      |  |
| VL44 | C:819,T:1      | C:506,T:1 | C:994          | G:1254,A:5,T:3 | A:1007,G:2,C:1 | C:584,A:1,T:1 | T:881          | G:872,A:1     | G:1018          | G:857,A:2,T:1  |  |
| VL45 | C:988          | C:699,T:1 | C:1243,T:1     | G:1370,A:4,T:1 | A:1084,G:7     | C:770,A:2     | T:1078,A:1,C:1 | G:950,A:2     | G:1276,T:2,AC:2 | A:830,G:2      |  |
| VL46 | C:557          | C:382,T:1 | C:689,T:5      | A:857,G:1      | A:590          | C:438,T:1     | T:568,A:1      | G:610,A:1     | G:626           | G:451,A:1      |  |

Summary of the base calls by Illumina GAIIX sequencing for 536 B4a1a1 lineage samples from the Solomon Islands at positions diagnostic to haplogroups of the B4a lineage. Presence of heteroplasmy in a sample is classified by the technology which identified it: I = Illumina, S= Sanger sequencing.
